# Supplementary material for: Transition-metal-free regioselective C–H halogenation of imidazo[1,2-a]pyridines: sodium chlorite/bromite as the halogen source
Source: Royal Society of Chemistry journal article supplement (doi:10.1039/c7ra12100h), 2018-01-01

# Supporting Information

## Transition-Metal-Free Regioselective C-H Halogenation of Imidazo[1,2-*a*]pyridines: Sodium Chlorite/Bromite as the Halogen Source

Junxuan Li,<sup>a</sup> Jiayi Tang,<sup>a</sup> Yuanheng Wu,<sup>a</sup> Qiuxing He,<sup>a\*</sup> and Yue Yu<sup>a\*</sup>

<sup>a</sup> School of Chemistry and Chemical Engineering, Guangdong Pharmaceutical University,  
Zhongshan 528458, P. R. China.

E-mail: yuyue@gdpu.edu.cn; heqiuxing@126.com

Fax: +86 (760) 88207939

|                                                        |     |
|--------------------------------------------------------|-----|
| 1. General consideration.....                          | II  |
| 2. General procedure.....                              | II  |
| 3. Characterization data.....                          | III |
| 4. <sup>1</sup> H and <sup>13</sup> C NMR spectra..... | XI  |

## 1. General consideration

$^1\text{H}$  and  $^{13}\text{C}$  NMR spectra were recorded at 400 and 100 Hz, respectively. Mass spectra were recorded were obtained on a ESIMS. Elemental analyses were performed with a elemental analyzer. GC-MS was obtained using electron ionization. TLC was performed using commercially prepared 100-400 mesh silica gel plates.

## 2. General procedure

**Synthesis of 2a according to the following procedure:** A 25 mL sealed tube was charged with a stirring bar, and added imidazo[1,2-*a*]pyridine **1a** (0.5 mmol, 1.0 equiv),  $\text{NaClO}_2$  (1 mmol, 2.0 equiv), AcOH (2 mmol) and DMF (2 mL). The reaction was allowed to stir at  $60^\circ\text{C}$  until the complete consumption of **2a** was monitored by TLC analysis. The reaction mixture was purified by thin layer chromatography silica gel plate (eluent: petroleum ether : ethyl acetate, V : V = 10 : 1) and then extracted with EtOAc. The solvents were dried in vacuo to afford the pure product.

### 3. Characterization data

#### 2a 3-Chloroimidazo[1,2-*a*]pyridine

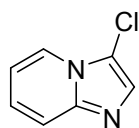

Brown oil (63.1 mg, 83%); IR (KBr): 2992, 1486, 1219, 1037, 954  $\text{cm}^{-1}$ ;  $^1\text{H}$  NMR (400 MHz,  $\text{CDCl}_3$ )  $\delta$  8.05 (d,  $J = 6.4$  Hz, 1H), 7.61 (t,  $J = 9.2$  Hz, 2H), 7.21 (t,  $J = 7.6$  Hz, 1H), 6.91 (t,  $J = 6.8$  Hz, 1H).  $^{13}\text{C}$  NMR (100 MHz,  $\text{CDCl}_3$ )  $\delta$  144.7, 130.2, 124.2, 122.5, 118.0, 112.9, 109.6. ESI-MS  $m/z$  (%) 153(100)[ $\text{M}+\text{H}$ ] $^+$ ; Anal. Calcd for  $\text{C}_7\text{H}_5\text{ClN}_2$  C, 55.10; H, 3.30; N, 18.36; Found: C, 54.91; H, 3.31; N, 18.45.

#### 2b 3-Chloro-6-methylimidazo[1,2-*a*]pyridine

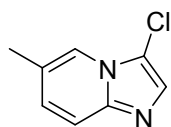

Brown oil (66.4 mg, 80%); IR (KBr): 2986, 1476, 1233, 1025, 960  $\text{cm}^{-1}$ ;  $^1\text{H}$  NMR (400 MHz,  $\text{CDCl}_3$ )  $\delta$  7.85 (s, 1H), 7.52 (d,  $J = 6.0$  Hz, 2H), 7.08 (d,  $J = 9.2$  Hz, 1H), 2.38 (s, 3H).  $^{13}\text{C}$  NMR (100 MHz,  $\text{CDCl}_3$ )  $\delta$  143.6, 129.9, 127.5, 122.8, 120.2, 117.4, 109.2, 18.3. ESI-MS  $m/z$  (%) 167(100)[ $\text{M}+\text{H}$ ] $^+$ ; Anal. Calcd for  $\text{C}_8\text{H}_7\text{ClN}_2$  C, 57.67; H, 4.24; N, 16.81; Found: C, 57.43; H, 4.23; N, 16.89.

#### 2c 3,6-Dichloroimidazo[1,2-*a*]pyridine

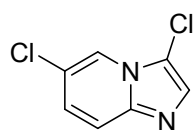

Yellow oil (62.3 mg, 67%); IR (KBr): 2989, 1506, 1249, 899, 690  $\text{cm}^{-1}$ ;  $^1\text{H}$  NMR (400 MHz,  $\text{CDCl}_3$ )  $\delta$  8.13 (s, 1H), 7.57 (d,  $J = 9.6$  Hz, 2H), 7.19 (d,  $J = 8.6$  Hz, 1H).  $^{13}\text{C}$  NMR (100 MHz,  $\text{CDCl}_3$ )  $\delta$  131.0, 126.0, 126.0, 121.8, 120.7, 118.5, 100.0. ESI-MS  $m/z$  (%) 187(100)[ $\text{M}+\text{H}$ ] $^+$ ; Anal. Calcd for  $\text{C}_7\text{H}_4\text{Cl}_2\text{N}_2$  C, 44.95; H, 2.16; N, 14.98; Found: C, 45.09; H, 2.13; N, 14.90.

#### 2d 3-Chloro-6-iodoimidazo[1,2-*a*]pyridine

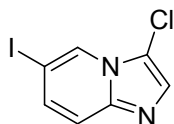

Brown oil (88.6 mg, 64%); IR (KBr): 2977, 1456, 1228, 1027, 954  $\text{cm}^{-1}$ ;  $^1\text{H}$  NMR (400 MHz,  $\text{CDCl}_3$ )  $\delta$  8.31 (s, 1H), 7.51 (s, 1H), 7.44-7.33 (m, 2H).  $^{13}\text{C}$  NMR (100 MHz,  $\text{CDCl}_3$ )  $\delta$  143.0, 132.5, 130.4, 127.7, 118.9, 118.9, 109.5. ESI-MS  $m/z$  (%) 278(100)[ $\text{M}+\text{H}$ ] $^+$ ; Anal. Calcd for  $\text{C}_7\text{H}_4\text{ClIN}_2$  C, 30.19; H, 1.45; N, 10.06; Found: C, 30.47; H, 1.40; N, 9.95.

### 2e 3-Chloro-7-methylimidazo[1,2-a]pyridine

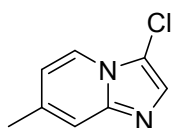

Brown oil (70.1 mg, 85%); IR (KBr): 2973, 1478, 1259, 1011, 931  $\text{cm}^{-1}$ ;  $^1\text{H}$  NMR (400 MHz,  $\text{CDCl}_3$ )  $\delta$  7.94 (d,  $J = 6.8$  Hz, 1H), 7.47 (s, 1H), 7.36 (s, 1H), 6.76 (d,  $J = 7.2$  Hz, 1H), 2.41 (s, 3H).  $^{13}\text{C}$  NMR (100MHz,  $\text{CDCl}_3$ )  $\delta$  144.8, 135.5, 129.6, 121.7, 116.3, 115.7, 109.0, 21.2. ESI-MS  $m/z$  (%) 167(100)[ $\text{M}+\text{H}$ ] $^+$ ; Anal. Calcd for  $\text{C}_8\text{H}_7\text{ClN}_2$  C, 57.67; H, 4.24; N, 16.81; Found: C, 57.45; H, 4.26; N, 16.89.

### 2f 3-Chloro-8-methylimidazo[1,2-a]pyridine

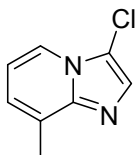

Brown oil (73.8 mg, 89%); IR (KBr): 2956, 1485, 1237, 1017, 921  $\text{cm}^{-1}$ ;  $^1\text{H}$  NMR (400 MHz,  $\text{CDCl}_3$ )  $\delta$  7.87 (d,  $J = 6.8$  Hz, 1H), 7.46 (s, 1H), 6.94 (d,  $J = 6.8$  Hz, 1H), 6.78 (t,  $J = 6.8$  Hz, 1H), 2.53 (s, 3H).  $^{13}\text{C}$  NMR (100 MHz,  $\text{CDCl}_3$ )  $\delta$  144.8, 129.4, 127.9, 123.2, 120.5, 113.1, 109.9, 16.4. ESI-MS  $m/z$  (%) 167(100)[ $\text{M}+\text{H}$ ] $^+$ ; Anal. Calcd for  $\text{C}_8\text{H}_7\text{ClN}_2$  C, 57.67; H, 4.24; N, 16.81; Found: C, 57.41; H, 4.22; N, 16.90.

### 2g 3-Chloro-2-methylimidazo[1,2-a]pyridine

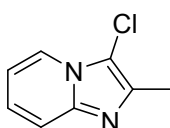

Yellow oil (66.4 mg, 80%); IR (KBr): 2899, 1453, 1172, 1023, 857  $\text{cm}^{-1}$ ;  $^1\text{H}$  NMR (400 MHz,  $\text{CDCl}_3$ )  $\delta$  8.00 (d,  $J = 6.8$  Hz, 1H), 7.54 (d,  $J = 8.8$  Hz, 1H), 7.20 (t,  $J = 8.0$  Hz, 1H), 6.90 (t,  $J = 6.8$  Hz, 1H), 2.46 (s, 3H).  $^{13}\text{C}$  NMR (100 MHz,  $\text{CDCl}_3$ )  $\delta$  143.3, 138.8, 124.1, 122.4, 117.0, 112.5, 110.2, 12.8. ESI-MS  $m/z$  (%) 167(100)[ $\text{M}+\text{H}$ ] $^+$ ; Anal. Calcd for  $\text{C}_8\text{H}_7\text{ClN}_2$  C, 57.67; H, 4.24; N, 16.81; Found: C, 57.87; H, 4.21; N, 16.72.

**2h 3-Chloro-2,6-dimethylimidazo[1,2-*a*]pyridine**

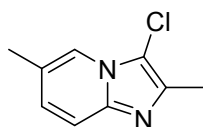

Yellow oil (72.9 mg, 81%); IR (KBr): 2907, 1444, 1208, 1021, 869  $\text{cm}^{-1}$ ;  $^1\text{H}$  NMR (400 MHz,  $\text{CDCl}_3$ )  $\delta$  7.65 (s, 1H), 7.32 (d,  $J = 9.2$  Hz, 1H), 6.93 (d,  $J = 9.2$  Hz, 1H), 2.34 (s, 3H), 2.25 (s, 3H).  $^{13}\text{C}$  NMR (100 MHz,  $\text{CDCl}_3$ )  $\delta$  142.4, 138.5, 127.1, 122.1, 120.1, 116.2, 105.9, 18.2, 12.8. ESI-MS  $m/z$  (%) 181(100)[ $\text{M}+\text{H}$ ] $^+$ ; Anal. Calcd for  $\text{C}_9\text{H}_9\text{ClN}_2$  C, 59.84; H, 5.02; N, 15.51; Found: C, 60.03; H, 4.99; N, 15.43.

**2i 3-Chloro-2,7-dimethylimidazo[1,2-*a*]pyridine**

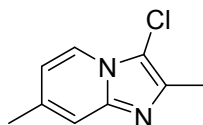

Yellow oil (72.9 mg, 81%); IR (KBr): 2906, 1515, 1230, 1008, 906  $\text{cm}^{-1}$ ;  $^1\text{H}$  NMR (400 MHz,  $\text{CDCl}_3$ )  $\delta$  7.77 (t,  $J = 6.8$  Hz, 1H), 7.17 (s, 1H), 6.62-6.58 (m, 1H), 2.34-2.30 (m, 6H).  $^{13}\text{C}$  NMR (100 MHz,  $\text{CDCl}_3$ )  $\delta$  143.7, 138.2, 135.1, 121.6, 115.4, 115.0, 105.7, 21.2, 12.7. ESI-MS  $m/z$  (%) 181(100)[ $\text{M}+\text{H}$ ] $^+$ ; Anal. Calcd for  $\text{C}_9\text{H}_9\text{ClN}_2$  C, 59.84; H, 5.02; N, 15.51; Found: C, 59.59; H, 5.04; N, 15.58.

**2j 3-Chloro-2,8-dimethylimidazo[1,2-*a*]pyridine**

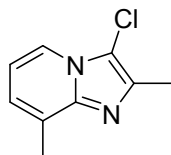

Brown oil (70.2 mg, 78%); IR (KBr): 2886, 1446, 1219, 1033, 846  $\text{cm}^{-1}$ ;  $^1\text{H}$  NMR (400 MHz,  $\text{CDCl}_3$ )  $\delta$  7.81 (d,  $J = 6.8$  Hz, 1H), 6.93 (d,  $J = 6.4$  Hz, 1H), 6.75 (t,  $J = 6.8$  Hz, 1H), 2.52 (s, 3H),

2.41 (s, 3H). <sup>13</sup>C NMR (100 MHz, CDCl<sub>3</sub>) δ 143.6, 138.0, 126.8, 123.2, 120.4, 112.5, 108.7, 16.6, 12.8. ESI-MS m/z (%) 181(100)[M+H]<sup>+</sup>; Anal. Calcd for C<sub>9</sub>H<sub>9</sub>ClN<sub>2</sub> C, 59.84; H, 5.02; N, 15.51; Found: C, 59.56; H, 5.05; N, 15.59.

**2k 2-(tert-Butyl)-3-chloroimidazo[1,2-a]pyridine**

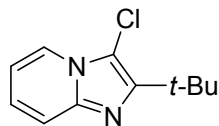

Brown oil (89.4 mg, 86%); IR (KBr): 2957, 1476, 1239, 1037, 767 cm<sup>-1</sup>; <sup>1</sup>H NMR (400 MHz, CDCl<sub>3</sub>) δ 7.89 (d, *J* = 6.8 Hz, 1H), 7.47 (d, *J* = 8.8 Hz, 1H), 7.04 (t, *J* = 7.2 Hz, 1H), 6.73 (t, *J* = 6.8 Hz, 1H), 1.39 (s, 9H). <sup>13</sup>C NMR (100 MHz, CDCl<sub>3</sub>) δ 149.5, 142.2, 123.6, 122.0, 117.2, 112.3, 104.3, 32.9, 29.6. ESI-MS m/z (%) 209(100)[M+H]<sup>+</sup>; Anal. Calcd for C<sub>11</sub>H<sub>13</sub>ClN<sub>2</sub> C, 63.31; H, 6.28; N, 13.42; Found: C, 63.02; H, 6.31; N, 13.49.

**2l 2-(tert-Butyl)-3-chloro-7-methylimidazo[1,2-a]pyridine**

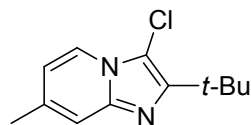

Brown oil (98.8 mg, 89%); IR (KBr): 2985, 1456, 1189, 10237, 860 cm<sup>-1</sup>; <sup>1</sup>H NMR (400 MHz, CDCl<sub>3</sub>) δ 7.82 (d, *J* = 7.2 Hz, 1H), 7.25 (s, 1H), 6.61 (d, *J* = 6.8 Hz, 1H), 2.30 (s, 3H), 1.40 (s, 9H). <sup>13</sup>C NMR (100 MHz, CDCl<sub>3</sub>) δ 149.1, 142.7, 134.8, 121.3, 115.8, 115.0, 103.6, 32.9, 29.6, 21.2. ESI-MS m/z (%) 223(100)[M+H]<sup>+</sup>; Anal. Calcd for C<sub>12</sub>H<sub>15</sub>ClN<sub>2</sub> C, 64.72; H, 6.79; N, 12.58; Found: C, 64.47; H, 6.77; N, 12.65.

**2m 2-(tert-Butyl)-3-chloro-8-methylimidazo[1,2-a]pyridine**

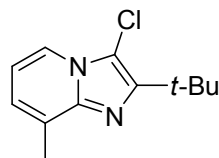

Brown oil (102.1 mg, 92%); IR (KBr): 2989, 1470, 1139, 1033, 861 cm<sup>-1</sup>; <sup>1</sup>H NMR (400 MHz, CDCl<sub>3</sub>) δ 7.88 (d, *J* = 6.8 Hz, 1H), 6.93 (d, *J* = 6.8 Hz, 1H), 6.76 (t, *J* = 6.8 Hz, 1H), 2.58 (s, 3H), 1.50 (s, 9H). <sup>13</sup>C NMR (100 MHz, CDCl<sub>3</sub>) δ 148.9, 142.5, 127.3, 122.4, 119.9, 112.3, 104.5, 33.0,

29.7, 16.5. ESI-MS  $m/z$  (%) 223(100)[M+H]<sup>+</sup>; Anal. Calcd for C<sub>12</sub>H<sub>15</sub>ClN<sub>2</sub> C, 64.72; H, 6.79; N, 12.58; Found: C, 64.52; H, 6.82; N, 12.64.

**2n 2-(tert-Butyl)-3-chloro-6-methylimidazo[1,2-a]pyridine**

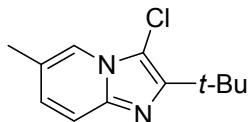

Brown oil (96.6 mg, 87%); IR (KBr): 2899, 1516, 1228, 1066, 790 cm<sup>-1</sup>; <sup>1</sup>H NMR (400 MHz, CDCl<sub>3</sub>) δ 7.81 (s, 1H), 7.49 (d, *J* = 9.2 Hz, 1H), 7.02 (d, *J* = 9.2 Hz, 1H), 2.34 (s, 3H), 1.49 (s, 9H). <sup>13</sup>C NMR (100 MHz, CDCl<sub>3</sub>) δ 149.3, 141.3, 126.9, 122.2, 119.8, 116.6, 103.9, 32.90, 29.6, 18.3. ESI-MS  $m/z$  (%) 223(100)[M+H]<sup>+</sup>; Anal. Calcd for C<sub>12</sub>H<sub>15</sub>ClN<sub>2</sub> C, 64.72; H, 6.79; N, 12.58; Found: C, 64.44; H, 6.83; N, 12.65.

**2o 3-Chloro-6-methyl-2-phenylimidazo[1,2-a]pyridine**

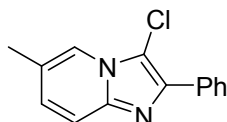

Brown oil (94.4 mg, 78%); IR (KBr): 2913, 1496, 1230, 1041, 832 cm<sup>-1</sup>; <sup>1</sup>H NMR (400 MHz, CDCl<sub>3</sub>) δ 8.12 (d, *J* = 7.2 Hz, 2H), 7.87 (s, 1H), 7.54-7.45 (m, 3H), 7.36 (t, *J* = 7.2 Hz, 1H), 7.07 (d, *J* = 8.8 Hz, 1H), 2.36 (s, 3H). <sup>13</sup>C NMR (100 MHz, CDCl<sub>3</sub>) δ 142.7, 139.4, 132.6, 128.4, 128.4, 128.0, 127.3, 122.7, 120.3, 116.8, 105.2, 18.3. ESI-MS  $m/z$  (%) 243(100)[M+H]<sup>+</sup>; Anal. Calcd for C<sub>14</sub>H<sub>11</sub>ClN<sub>2</sub> C, 69.28; H, 4.57; N, 11.54; Found: C, 68.99; H, 4.59; N, 11.60.

**2p 6-Bromo-3-chloro-2-phenylimidazo[1,2-a]pyridine**

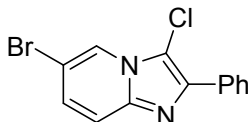

Brown solid (104.0 mg, 68%), mp 142.8-145.4 °C; IR (KBr): 2933, 1436, 1175, 1028, 913 cm<sup>-1</sup>; <sup>1</sup>H NMR (400 MHz, CDCl<sub>3</sub>) δ 8.25-8.21 (m, 2H), 7.62-7.50 (m, 4H), 7.30-7.26 (m, 2H). <sup>13</sup>C NMR (100 MHz, CDCl<sub>3</sub>) δ 134.3, 130.1, 128.0, 127.8, 127.8, 123.9, 122.7, 118.6, 118.5, 108.1, 108.0. ESI-MS  $m/z$  (%) 307(100)[M+H]<sup>+</sup>; Anal. Calcd for C<sub>13</sub>H<sub>8</sub>BrClN<sub>2</sub> C, 50.76; H, 2.62; N, 9.11; Found: C, 51.02; H, 2.58; N, 9.07.

**3a 3-Bromo-8-methylimidazo[1,2-*a*]pyridine**

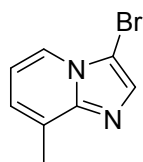

Brown oil (83.0 mg, 79%); IR (KBr): 2929, 1566, 880, 767, 682  $\text{cm}^{-1}$ ;  $^1\text{H}$  NMR (400 MHz,  $\text{CDCl}_3$ )  $\delta$  7.97 (d,  $J = 6.8$  Hz, 1H), 7.59 (s, 1H), 7.01 (d,  $J = 6.8$  Hz, 1H), 6.83 (t,  $J = 6.8$  Hz, 1H), 2.60 (s, 3H).  $^{13}\text{C}$  NMR (100 MHz,  $\text{CDCl}_3$ )  $\delta$  146.1, 132.8, 127.7, 123.3, 121.6, 113.1, 95.0, 16.4. ESI-MS  $m/z$  (%) 211(100)[ $\text{M}+\text{H}$ ] $^+$ ; Anal. Calcd for  $\text{C}_8\text{H}_7\text{BrN}_2$  C, 45.53; H, 3.34; N, 13.27; Found: C, 45.60; H, 3.35; N, 13.21.

**3b 3-Bromo-6-methylimidazo[1,2-*a*]pyridine**

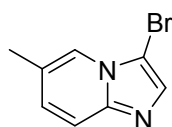

Brown oil (73.5 mg, 70%); IR (KBr): 2929, 1588, 1466, 1251, 1031, 765  $\text{cm}^{-1}$ ;  $^1\text{H}$  NMR (400 MHz,  $\text{CDCl}_3$ )  $\delta$  7.87 (s, 1H), 7.56 (s, 1H), 7.51 (d,  $J = 9.2$  Hz, 1H), 7.07 (d,  $J = 9.2$  Hz, 1H), 2.36 (s, 3H).  $^{13}\text{C}$  NMR (100 MHz,  $\text{CDCl}_3$ )  $\delta$  144.9, 133.3, 127.7, 122.9, 121.4, 117.2, 94.2, 18.3. ESI-MS  $m/z$  (%) 211(100)[ $\text{M}+\text{H}$ ] $^+$ ; Anal. Calcd for  $\text{C}_8\text{H}_7\text{BrN}_2$  C, 45.53; H, 3.34; N, 13.27; Found: C, 45.37; H, 3.35; N, 13.33.

**3c 3-Bromo-7-methylimidazo[1,2-*a*]pyridine**

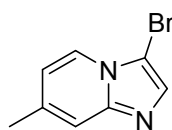

Brown oil (75.6 mg, 72%); IR (KBr): 2913, 1579, 1416, 1040, 766  $\text{cm}^{-1}$ ;  $^1\text{H}$  NMR (400 MHz,  $\text{CDCl}_3$ )  $\delta$  8.00 (d,  $J = 6.8$  Hz, 1H), 7.55 (s, 1H), 7.37 (s, 1H), 6.76 (d,  $J = 6.8$  Hz, 1H), 2.42 (s, 3H).  $^{13}\text{C}$  NMR (100 MHz,  $\text{CDCl}_3$ )  $\delta$  144.0, 135.6, 133.2, 122.9, 116.3, 115.8, 93.8, 21.2. ESI-MS  $m/z$  (%) 211(100)[ $\text{M}+\text{H}$ ] $^+$ ; Anal. Calcd for  $\text{C}_8\text{H}_7\text{BrN}_2$  C, 45.53; H, 3.34; N, 13.27; Found: C, 45.32; H, 3.32; N, 13.34.

**3d 3-Bromo-2-methylimidazo[1,2-*a*]pyridine**



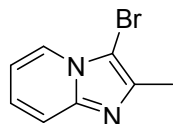

Brown oil (74.6 mg, 71%); IR (KBr): 2988, 1473, 1139, 1009, 778  $\text{cm}^{-1}$ ;  $^1\text{H}$  NMR (400 MHz,  $\text{CDCl}_3$ )  $\delta$  8.02 (d,  $J = 6.8$  Hz, 1H), 7.52 (d,  $J = 9.2$  Hz, 1H), 7.20 (t,  $J = 7.2$  Hz, 1H), 6.88 (t,  $J = 6.8$  Hz, 1H), 2.46 (s, 3H).  $^{13}\text{C}$  NMR (100 MHz,  $\text{CDCl}_3$ )  $\delta$  145.1, 141.8, 124.3, 123.6, 116.9, 112.6, 92.9, 13.6. ESI-MS  $m/z$  (%) 211(100)[ $\text{M}+\text{H}$ ] $^+$ ; Anal. Calcd for  $\text{C}_8\text{H}_7\text{BrN}_2$  C, 45.53; H, 3.34; N, 13.27; Found: C, 45.61; H, 3.33; N, 13.21.

### 3e 3-Bromo-2-phenylimidazo[1,2-a]pyridine

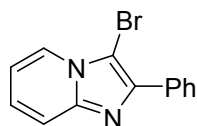

Brown oil (112.9 mg, 83%); IR (KBr): 2976, 1573, 1432, 1072, 897, 782  $\text{cm}^{-1}$ ;  $^1\text{H}$  NMR (400 MHz,  $\text{CDCl}_3$ )  $\delta$  8.17-8.11 (m, 3H), 7.64 (d,  $J = 9.2$  Hz, 1H), 7.48 (t,  $J = 7.6$  Hz, 2H), 7.39 (t,  $J = 7.2$  Hz, 1H), 7.26-7.19 (m, 1H), 6.91 (t,  $J = 6.4$  Hz, 1H).  $^{13}\text{C}$  NMR (100 MHz,  $\text{CDCl}_3$ )  $\delta$  145.5, 142.7, 132.8, 128.5, 128.3, 127.9, 125.2, 124.0, 117.6, 113.1, 91.8. ESI-MS  $m/z$  (%) 273 (100)[ $\text{M}+\text{H}$ ] $^+$ ; Anal. Calcd for  $\text{C}_{17}\text{H}_9\text{BrN}_2$  C, 57.17; H, 3.32; N, 10.26; Found: C, 56.38; H, 3.30; N, 10.21.

### 3f 3-Bromo-2-(tert-butyl)imidazo[1,2-a]pyridine

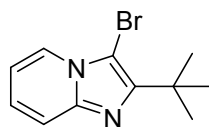

Brown oil (110.9 mg, 88%); IR (KBr): 2956, 1533, 1019, 884, 752  $\text{cm}^{-1}$ ;  $^1\text{H}$  NMR (400 MHz,  $\text{CDCl}_3$ )  $\delta$  8.06 (d,  $J = 4.8$  Hz, 1H), 7.54 (d,  $J = 10.0$  Hz, 1H), 7.13 (t,  $J = 8.0$  Hz, 1H), 6.85-6.78 (m, 1H), 1.49 (s, 9H).  $^{13}\text{C}$  NMR (100 MHz,  $\text{CDCl}_3$ )  $\delta$  151.9, 143.7, 124.0, 123.2, 117.2, 112.5, 90.0, 33.0, 29.6. ESI-MS  $m/z$  (%) 253 (100)[ $\text{M}+\text{H}$ ] $^+$ ; Anal. Calcd for  $\text{C}_{11}\text{H}_{13}\text{BrN}_2$  C, 52.19; H, 5.18; N, 11.07; Found: C, 51.96; H, 5.20; N, 11.13.

### 5a 3-(3,5-Dimethylphenyl)imidazo[1,2-a]pyridine

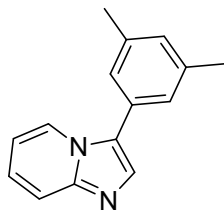

Yellow oil (49.3 mg, 74%); IR (KBr): 3006, 1461, 1010, 885, 709  $\text{cm}^{-1}$ ;  $^1\text{H}$  NMR (400 MHz,  $\text{CDCl}_3$ )  $\delta$  8.32 (d,  $J = 6.9$  Hz, 1H), 7.66 (t,  $J = 9.0$  Hz, 2H), 7.18-7.14 (m, 3H), 7.05 (s, 1H), 6.78 (t,  $J = 6.8$  Hz, 1H), 2.38 (s, 6H).  $^{13}\text{C}$  NMR (100 MHz,  $\text{CDCl}_3$ )  $\delta$  145.9, 138.7, 132.1, 131.9, 129.8, 128.9, 125.6, 123.9, 123.4, 118.0, 112.3, 21.2. ESI-MS  $m/z$  (%) 223 (100)[ $\text{M}+\text{H}$ ] $^+$ ; Anal. Calcd for  $\text{C}_{15}\text{H}_{14}\text{N}_2$  C, 81.05; H, 6.35; N, 12.60; Found: C, 81.37; H, 6.25; N, 12.38.

**6a 2-Methyl-3-(*o*-tolyl)imidazo[1,2-*a*]pyridine**

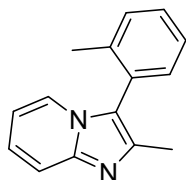

Yellow oil (52.6 mg, 79%); IR (KBr): 3024, 1437, 1109, 894, 766  $\text{cm}^{-1}$ ;  $^1\text{H}$  NMR (400 MHz,  $\text{CDCl}_3$ )  $\delta$  7.59-7.54 (m, 2H), 7.45-7.21 (m, 4H), 7.19-7.03 (m, 1H), 6.68 (t,  $J = 6.7$  Hz, 1H), 2.34 (s, 3H), 2.06 (s, 3H).  $^{13}\text{C}$  NMR (100 MHz,  $\text{CDCl}_3$ )  $\delta$  144.3, 140.8, 138.9, 131.6, 130.6, 129.2, 129.1, 128.3, 126.3, 123.8, 123.3, 116.7, 111.7, 19.3, 13.6. ESI-MS  $m/z$  (%) 223 (100)[ $\text{M}+\text{H}$ ] $^+$ ; Anal. Calcd for  $\text{C}_{15}\text{H}_{14}\text{N}_2$  C, 81.05; H, 6.35; N, 12.60; Found: C, 81.33; H, 6.27; N, 12.40.

## 4. $^1\text{H}$ and $^{13}\text{C}$ NMR spectra

2a

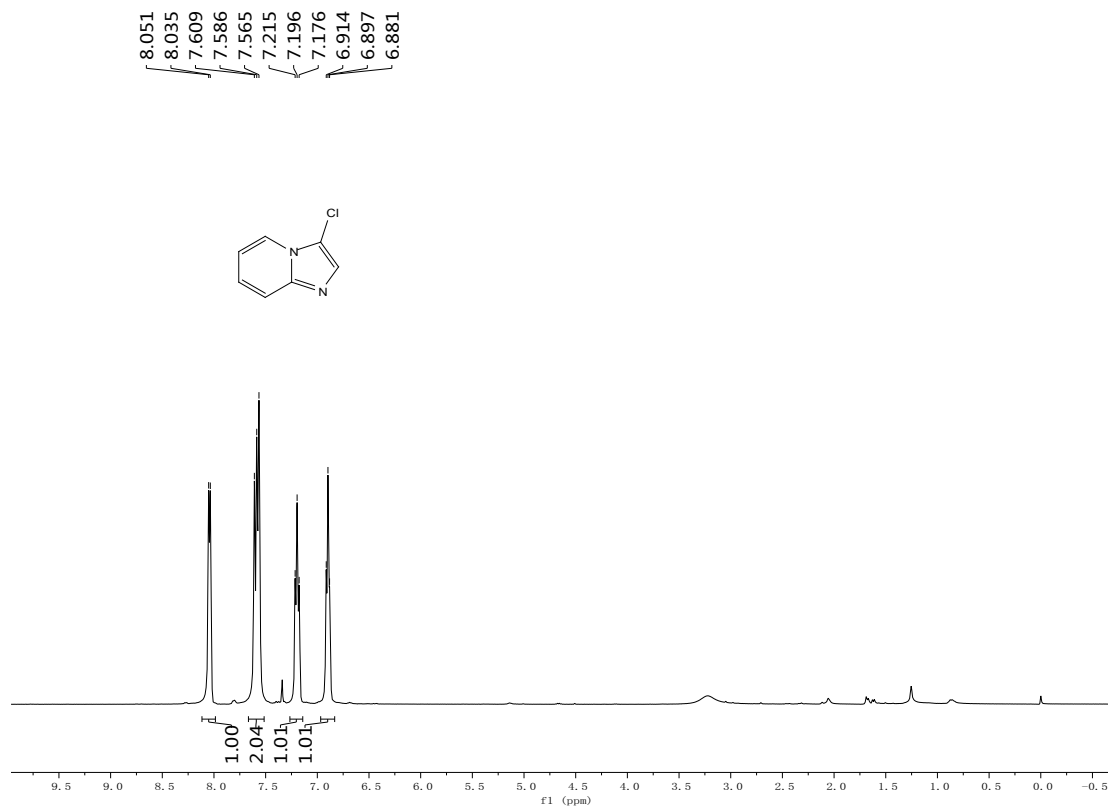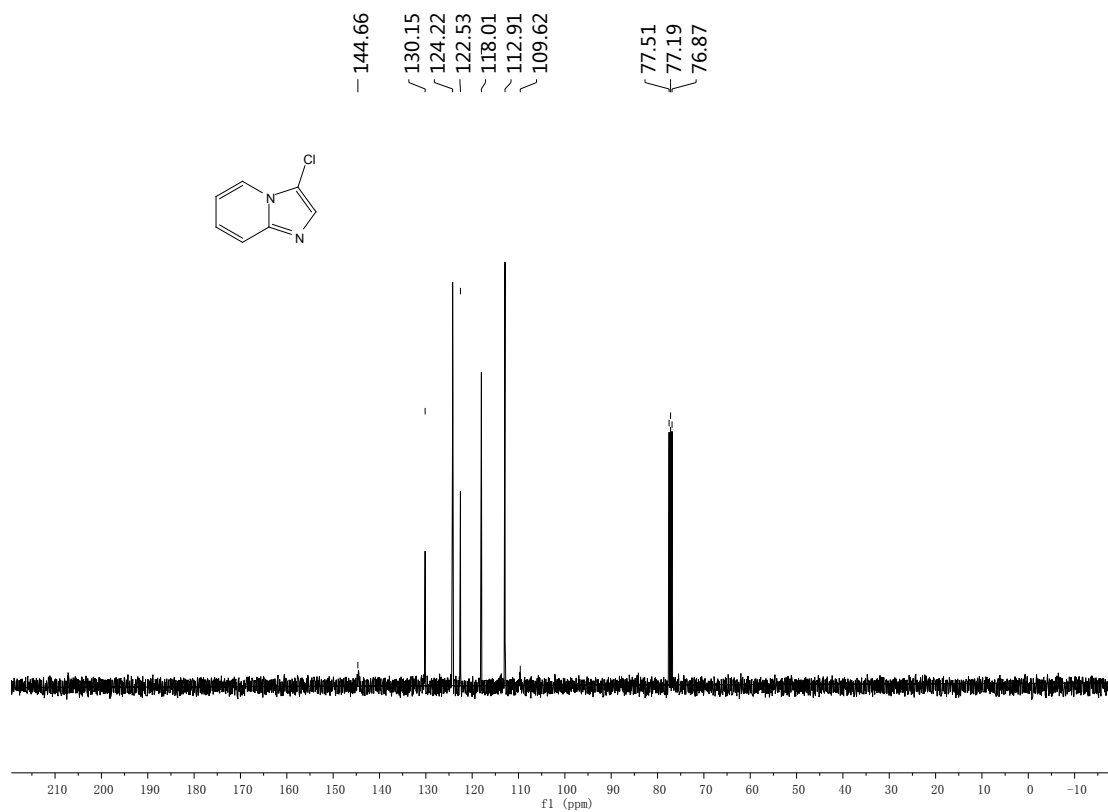

2b

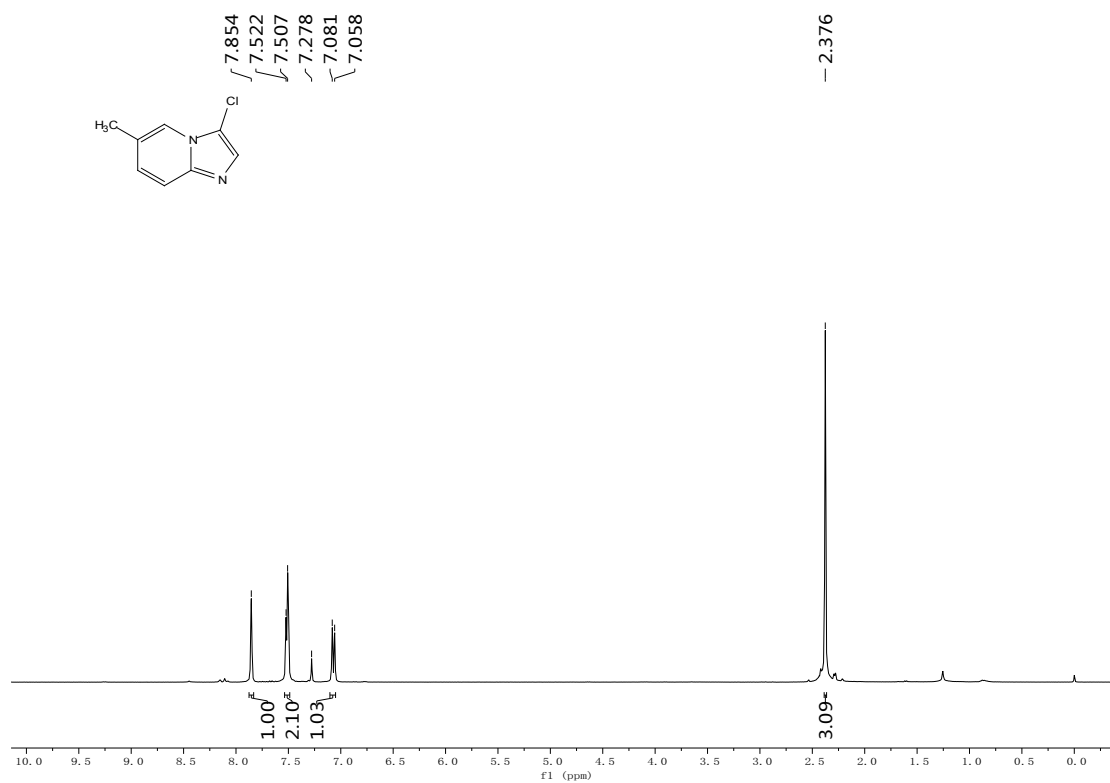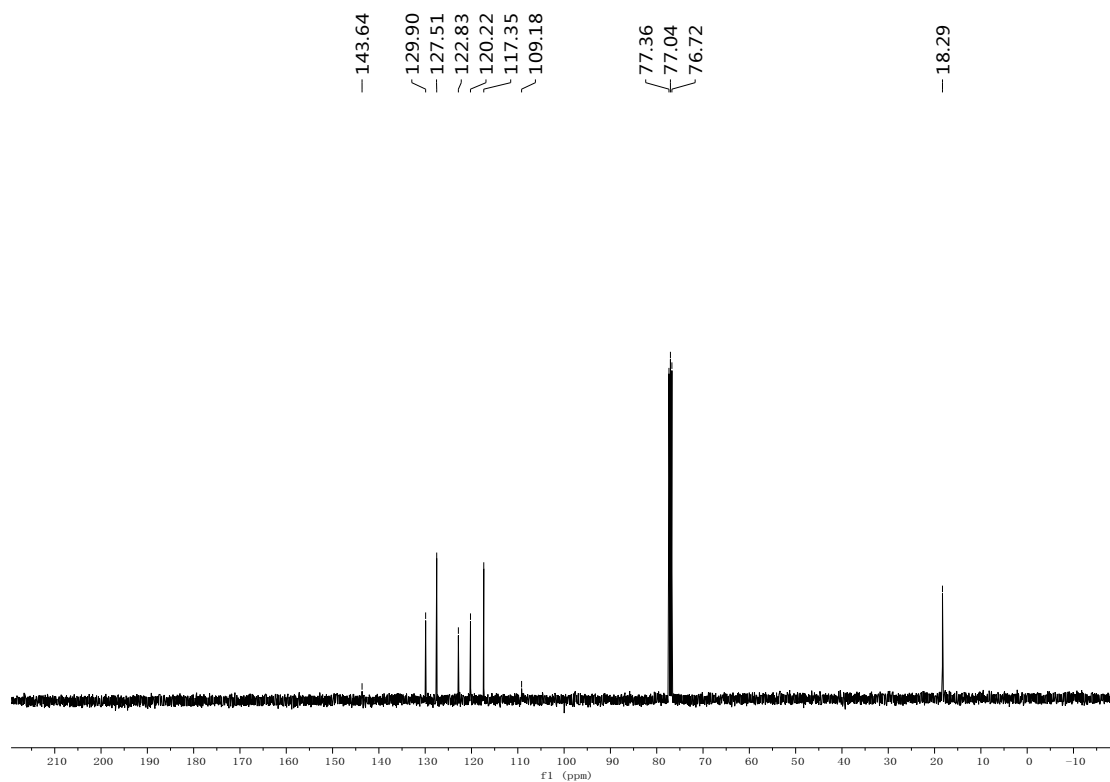

2c

8.13  
7.58  
7.56  
7.26  
7.20  
7.18

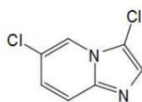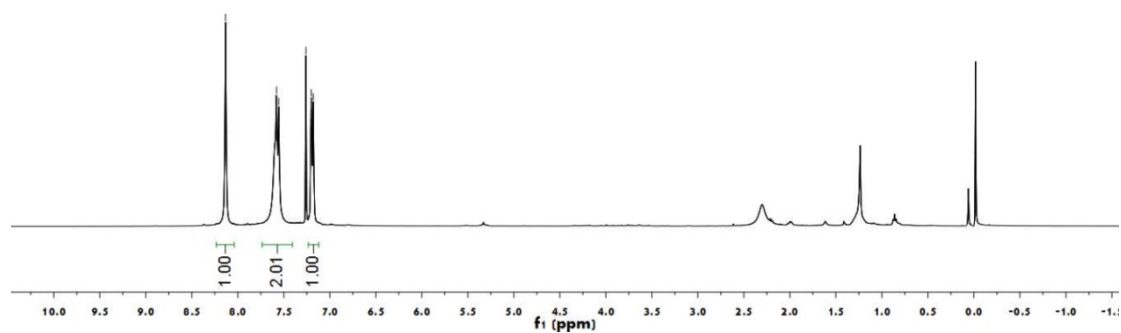

130.98  
126.04  
121.81  
120.66  
118.45  
99.95  
77.32  
77.00  
76.68

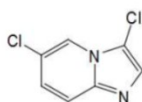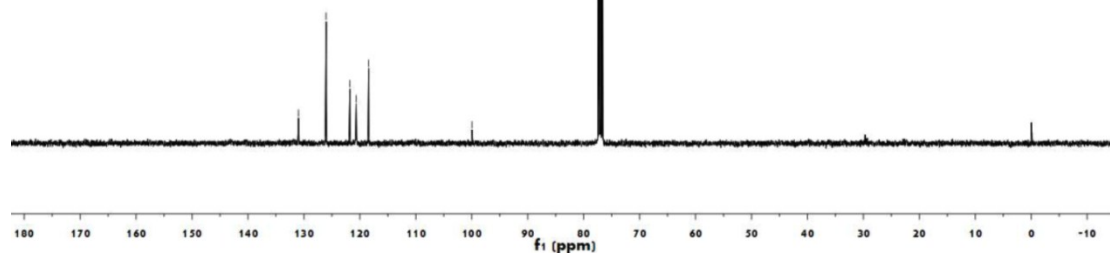

2d

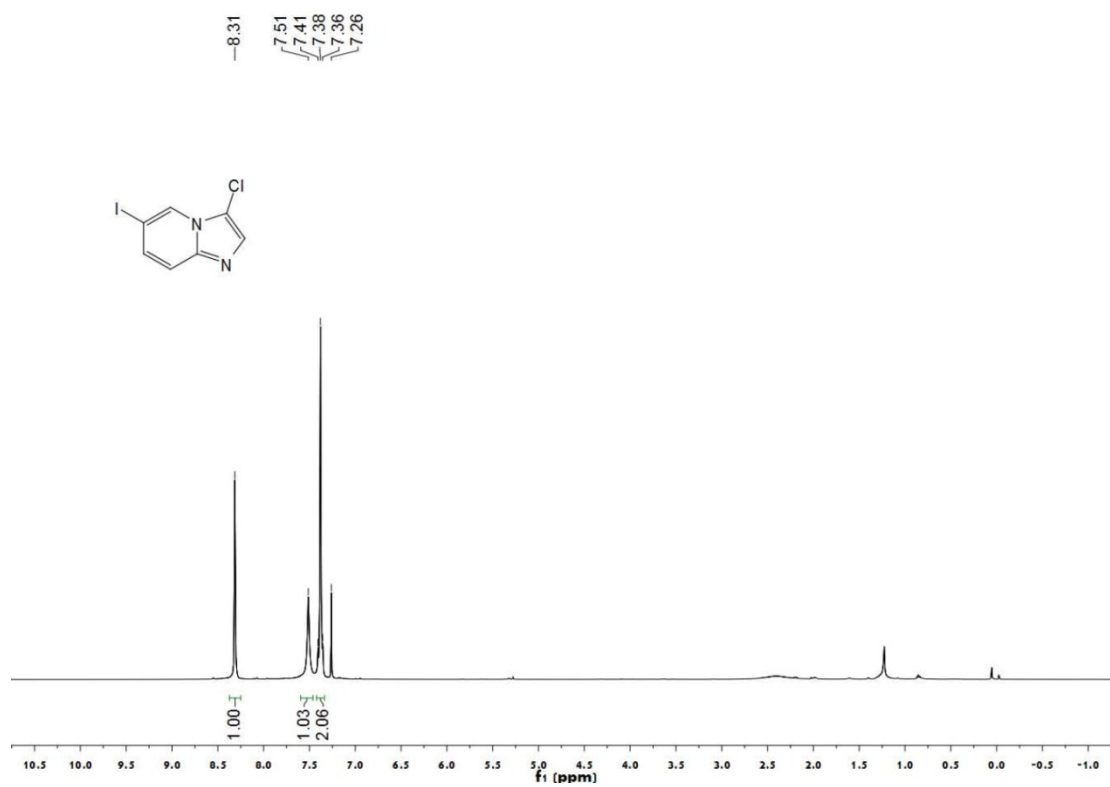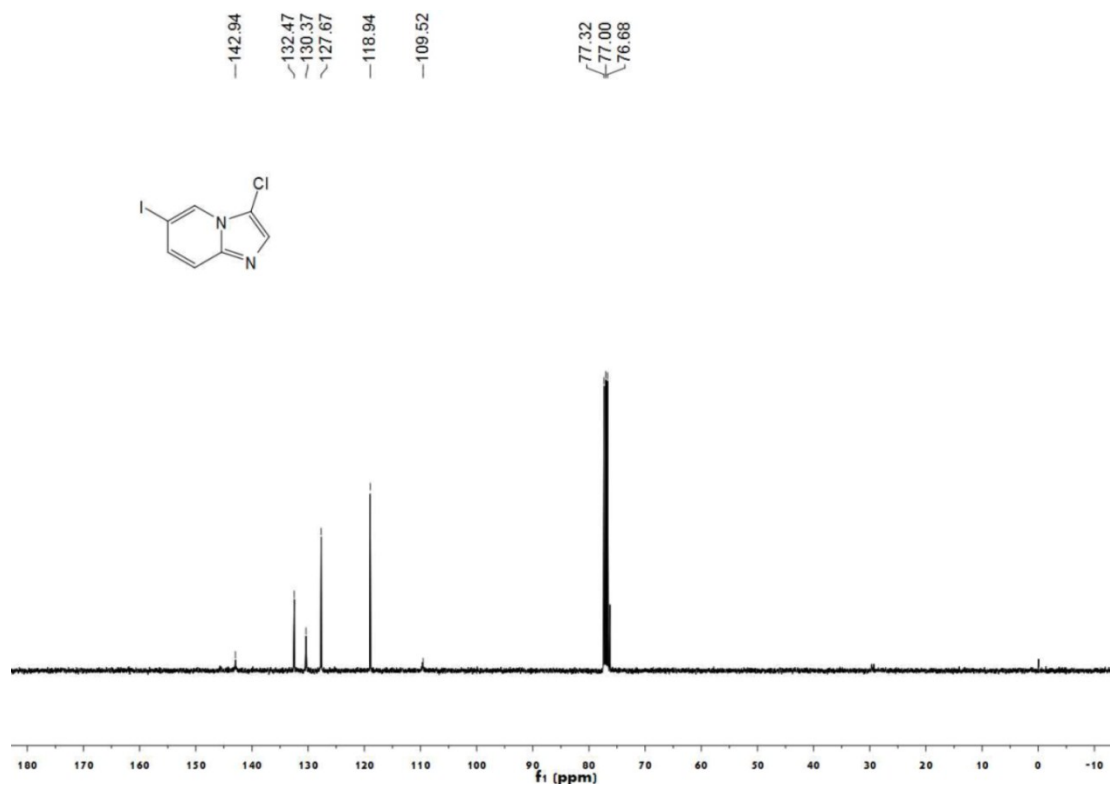

2e

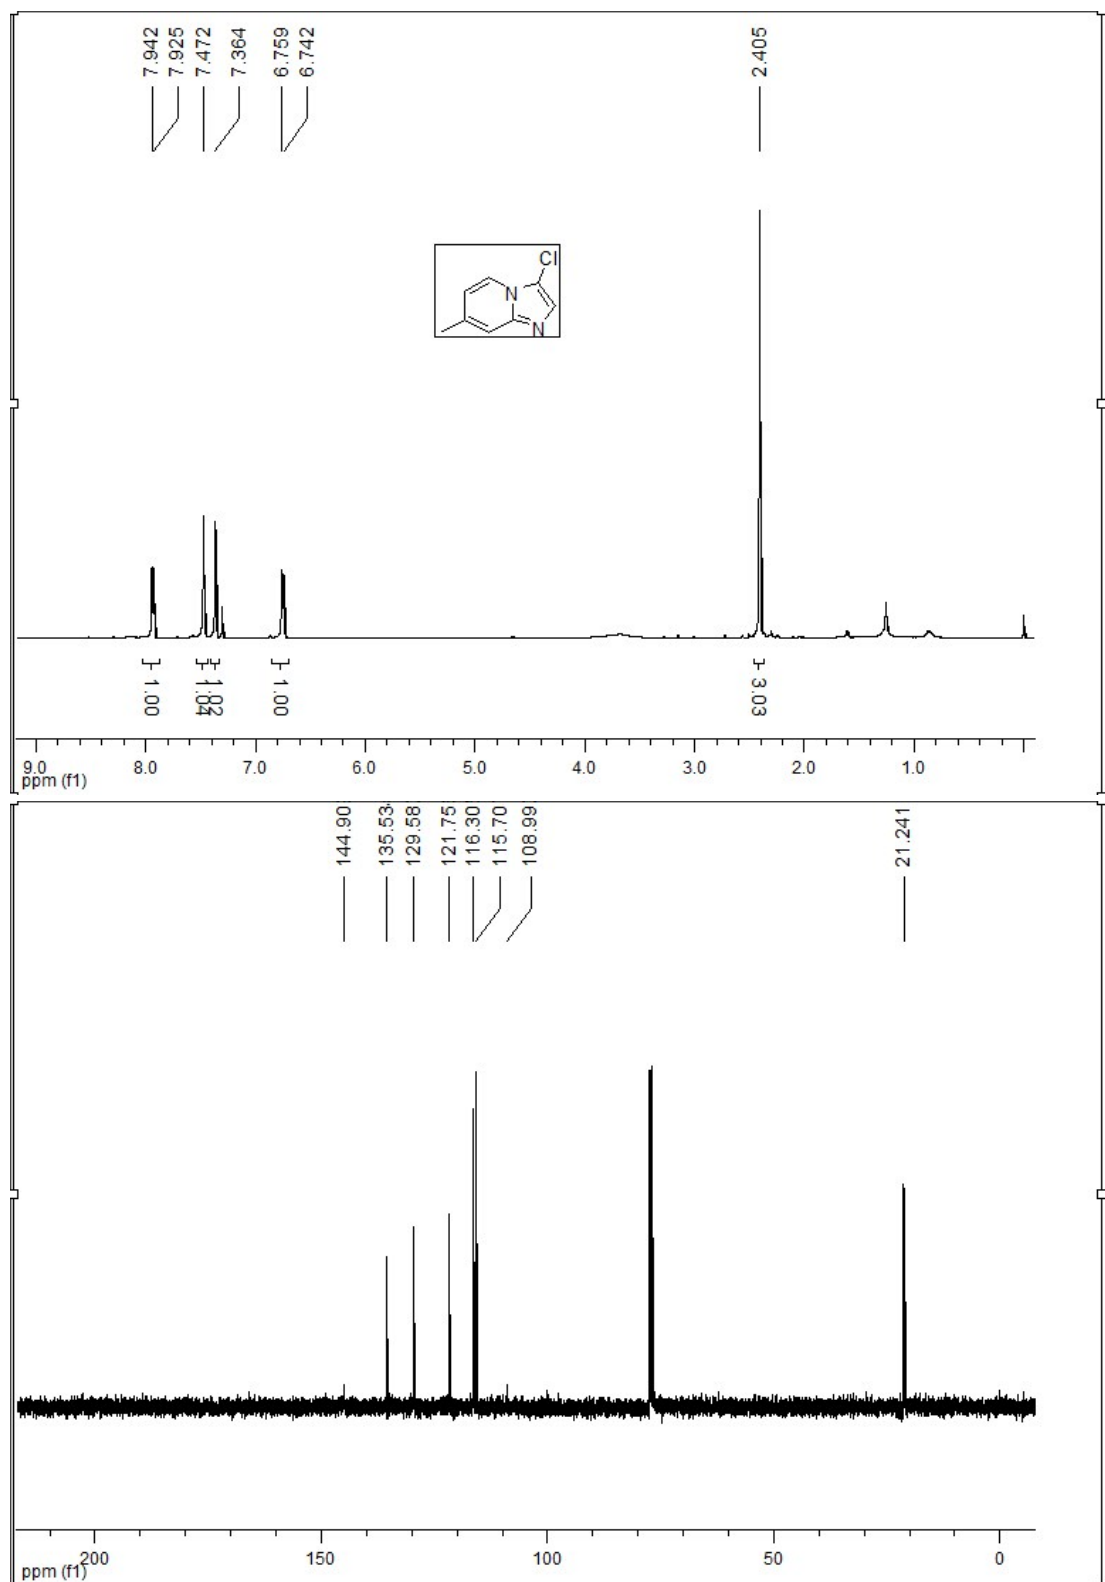

2f

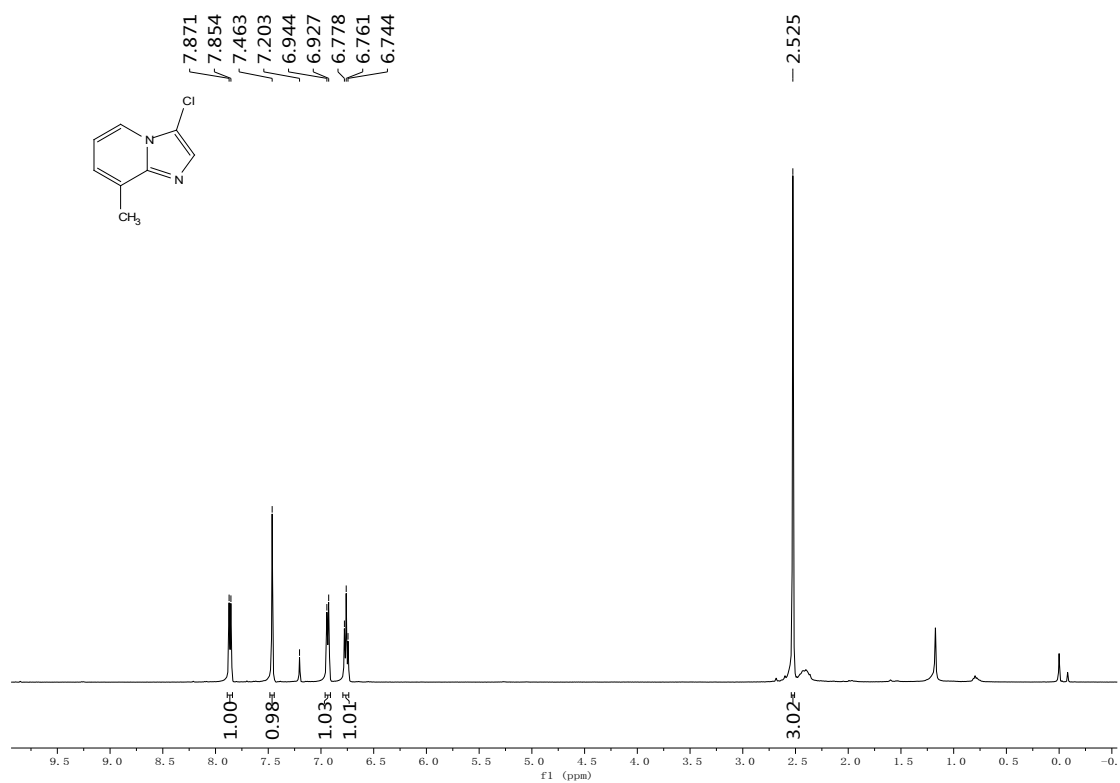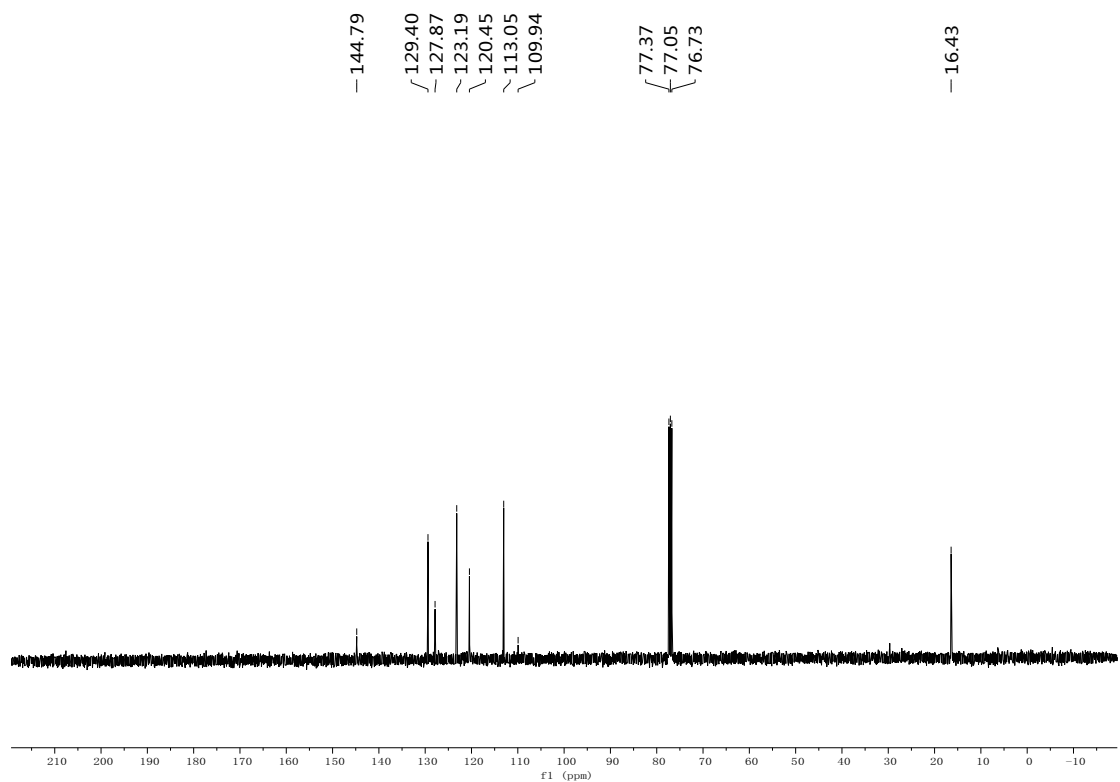

XVI



2g

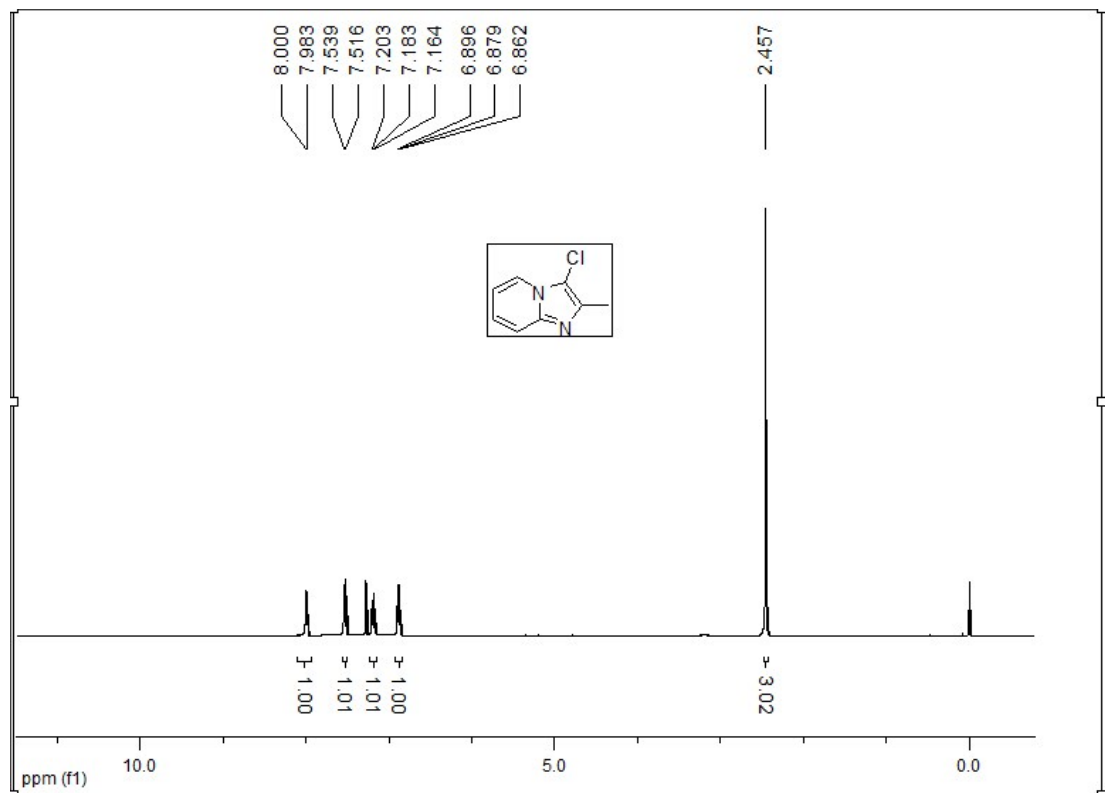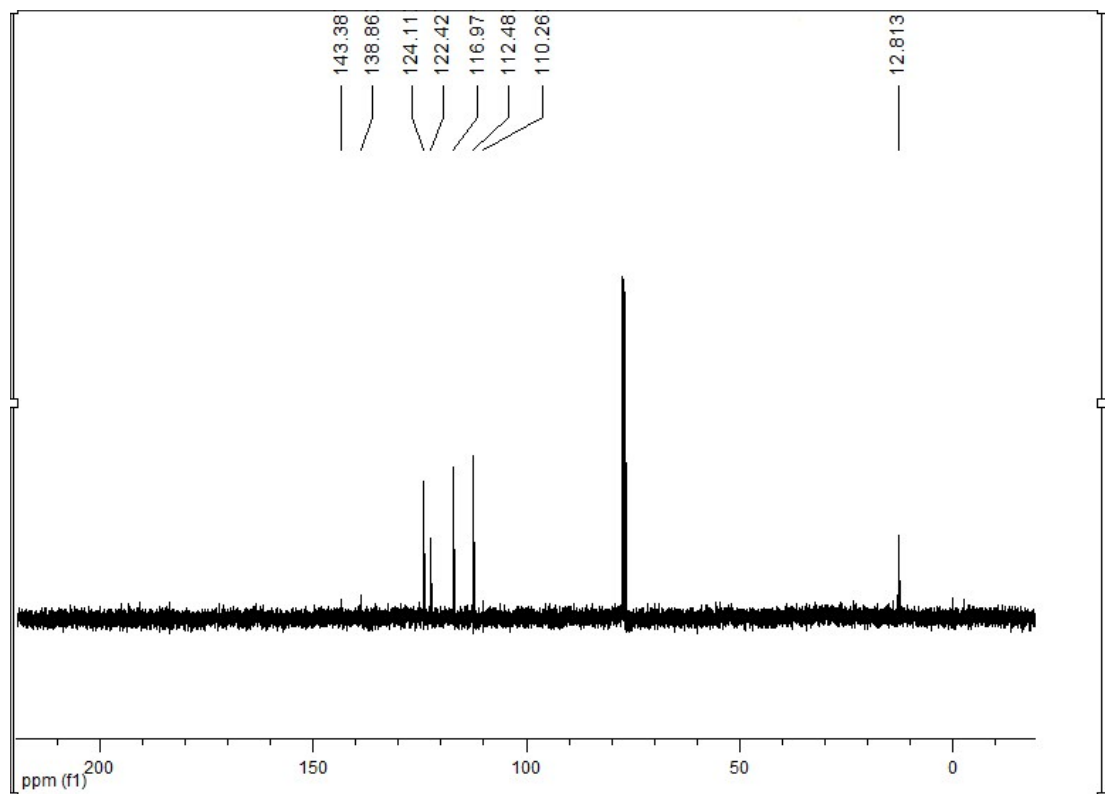

2h

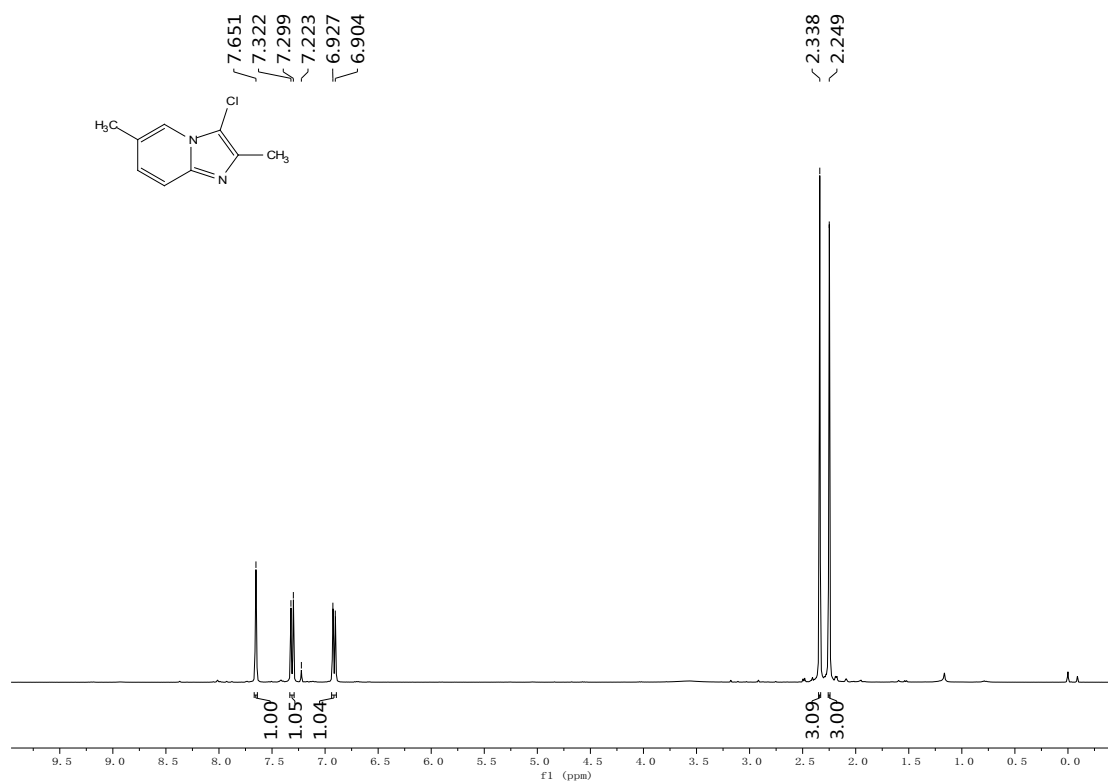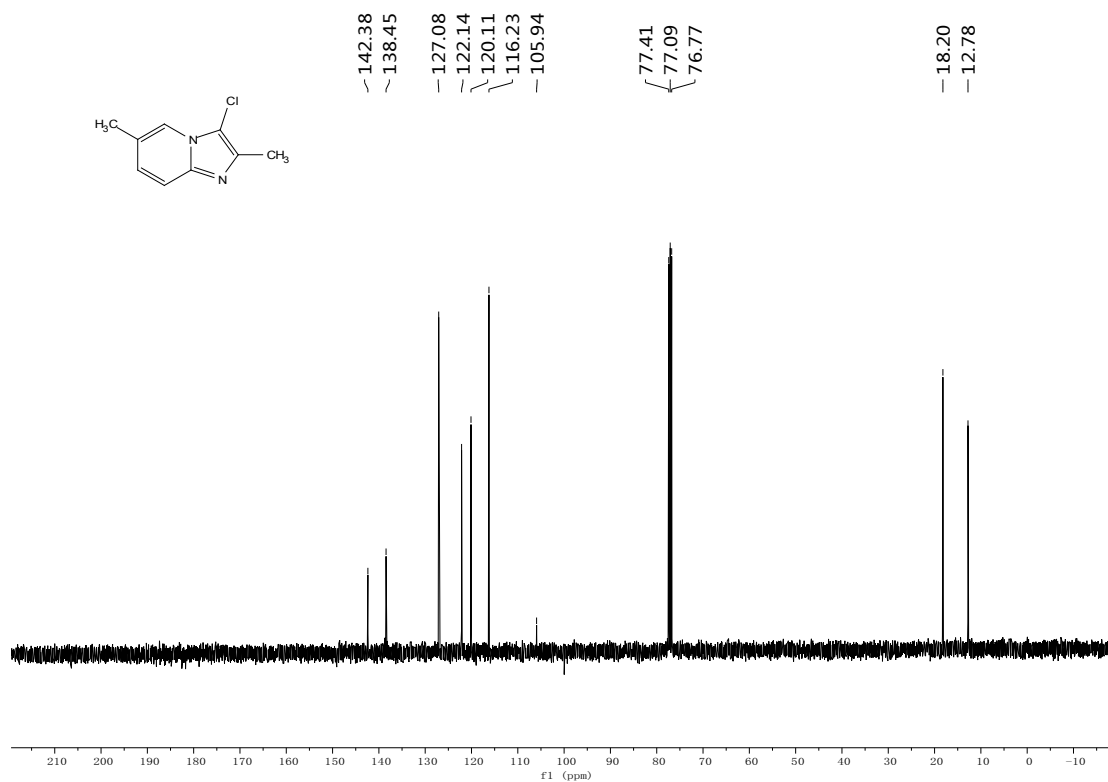

2i

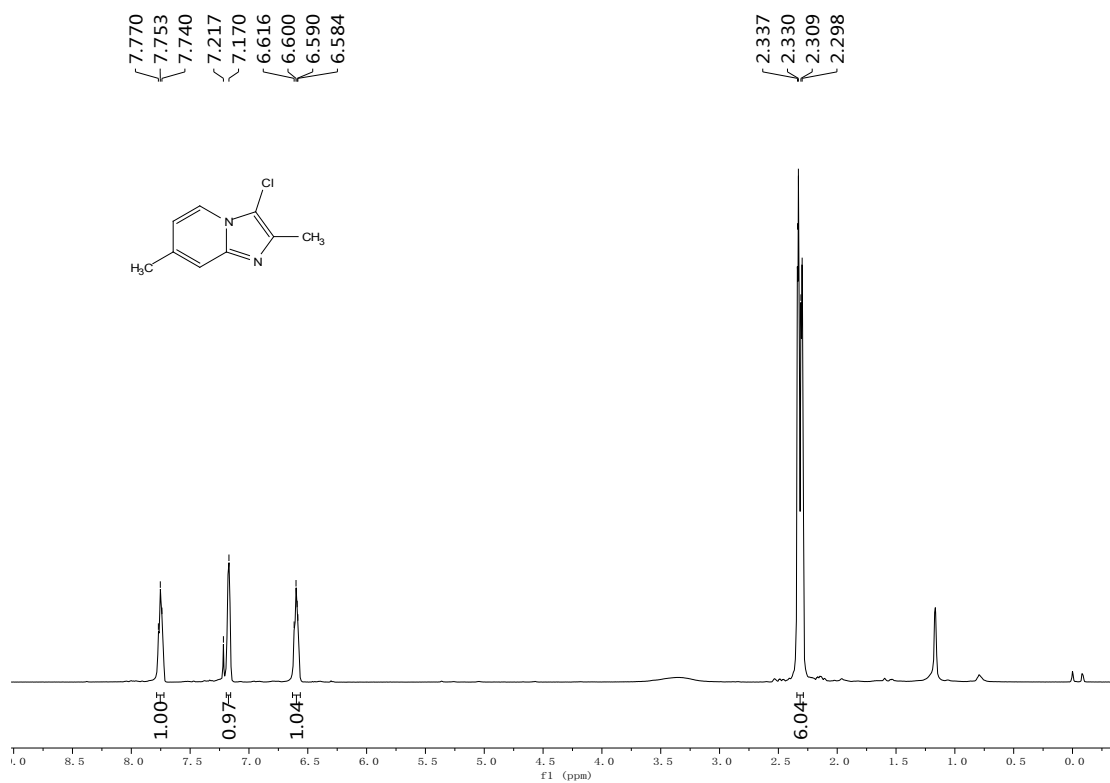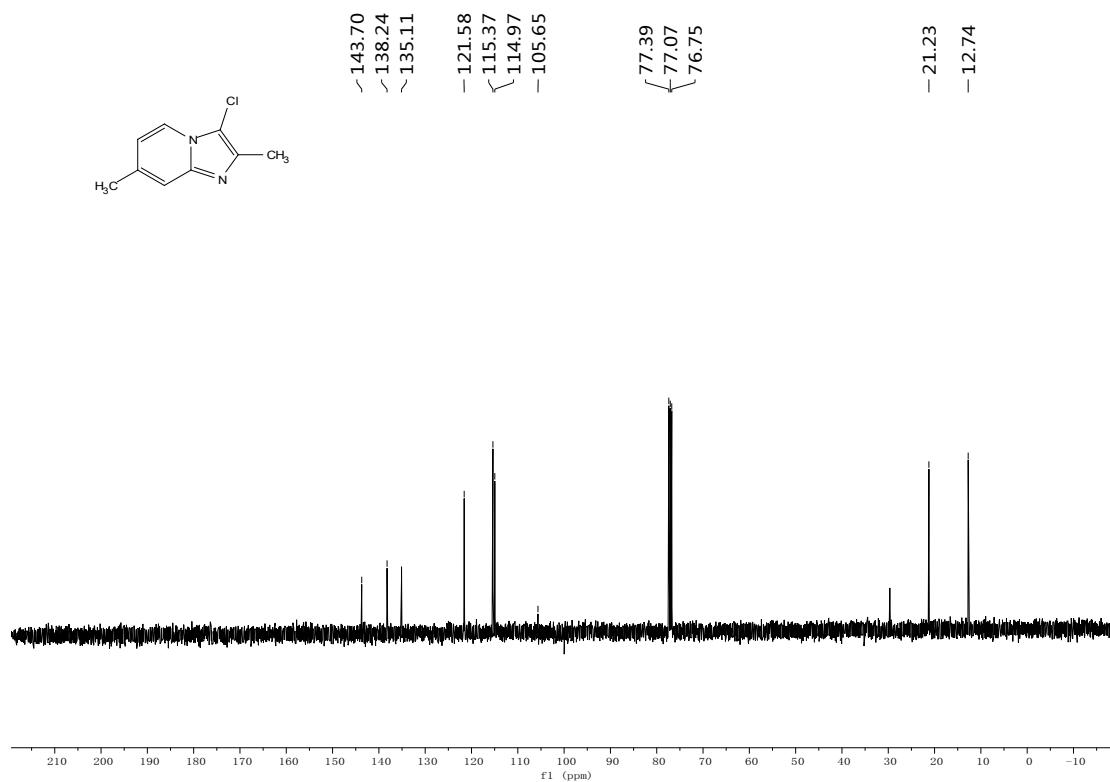

2j

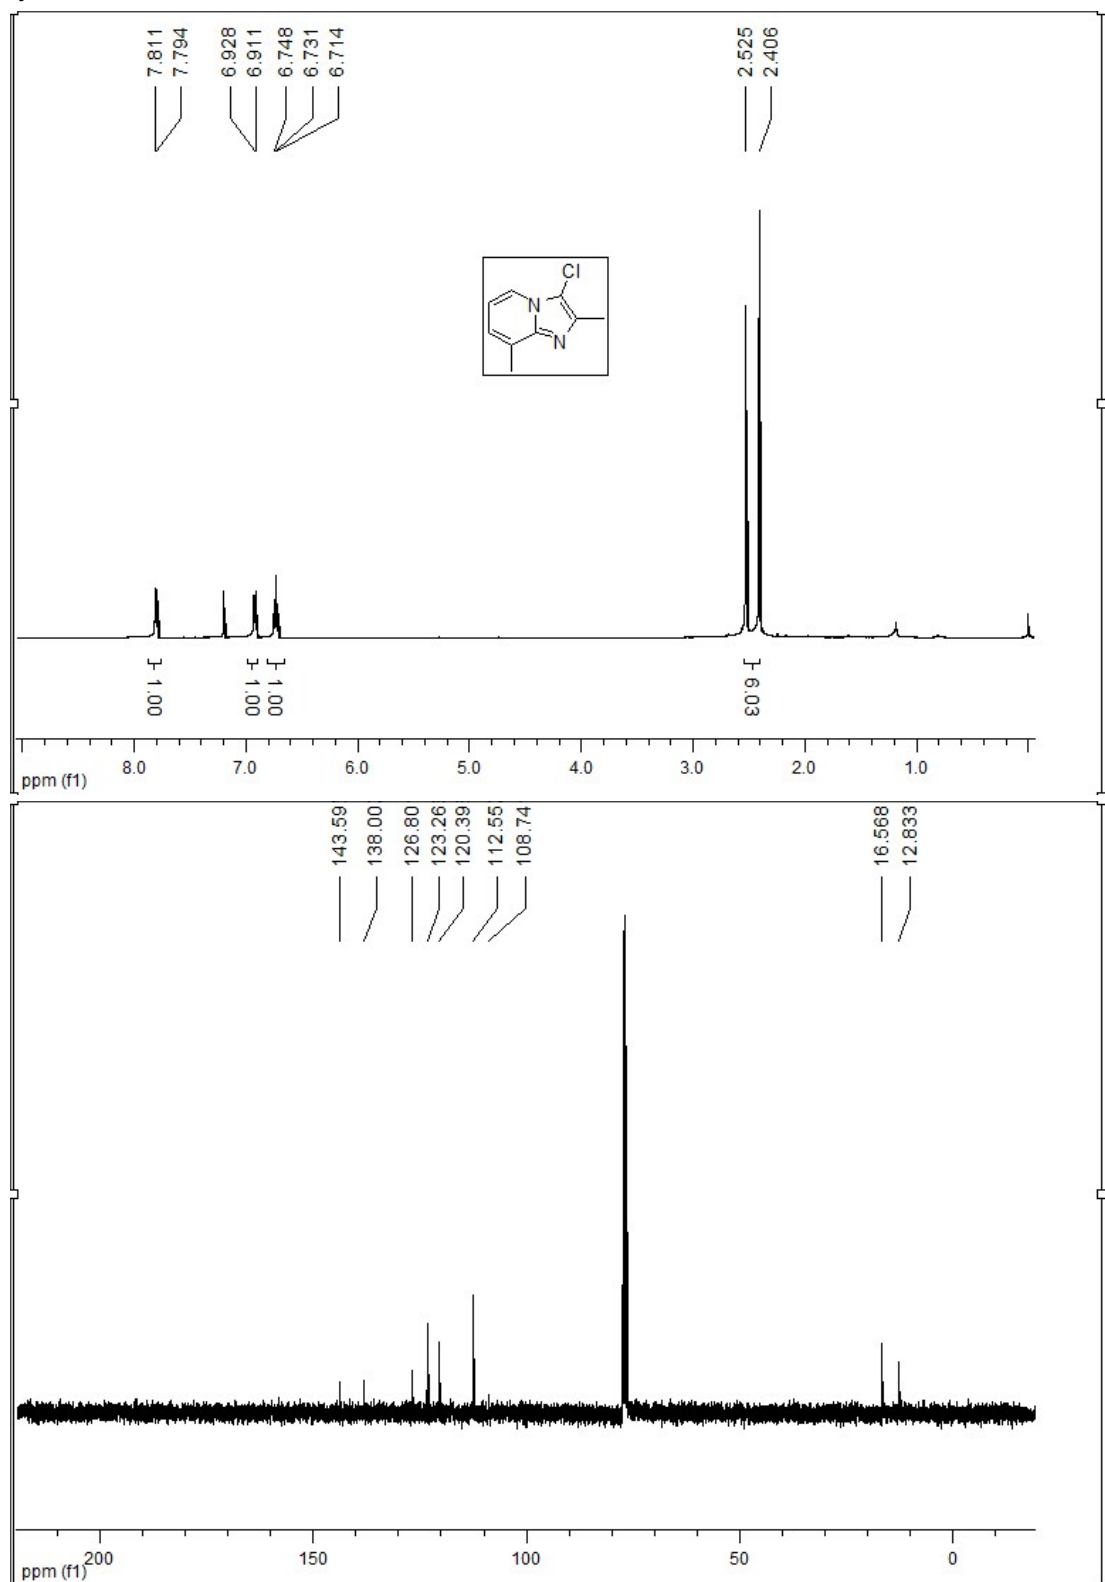

2k

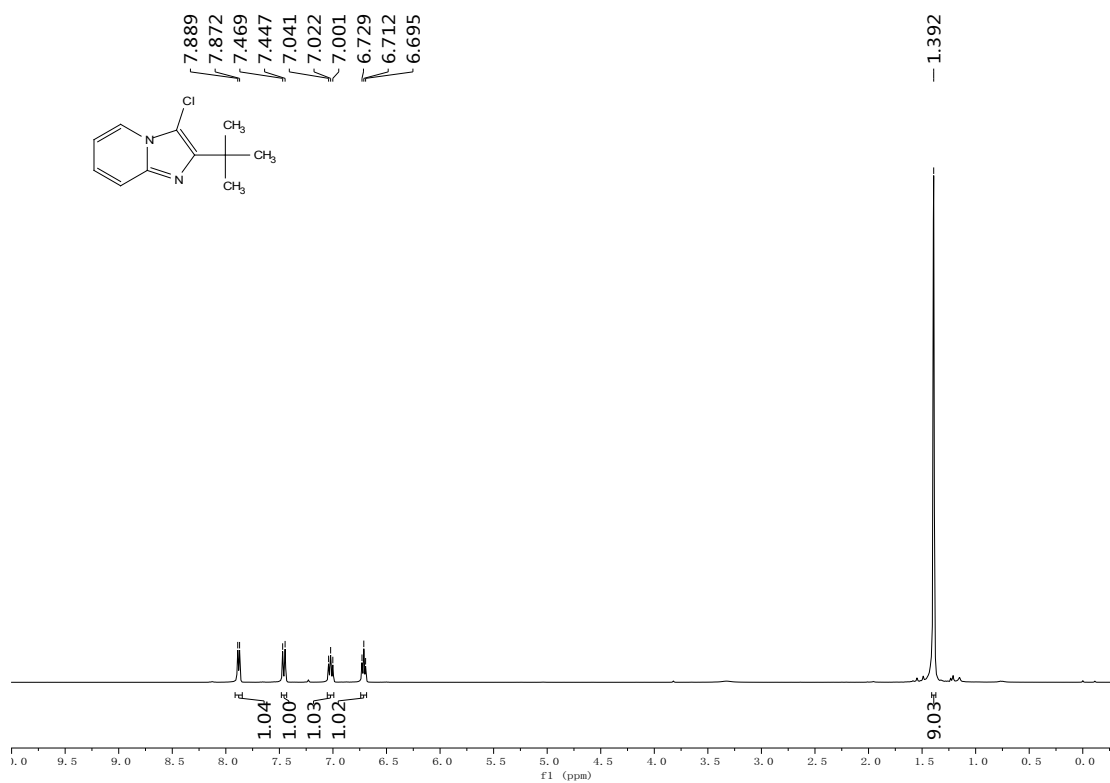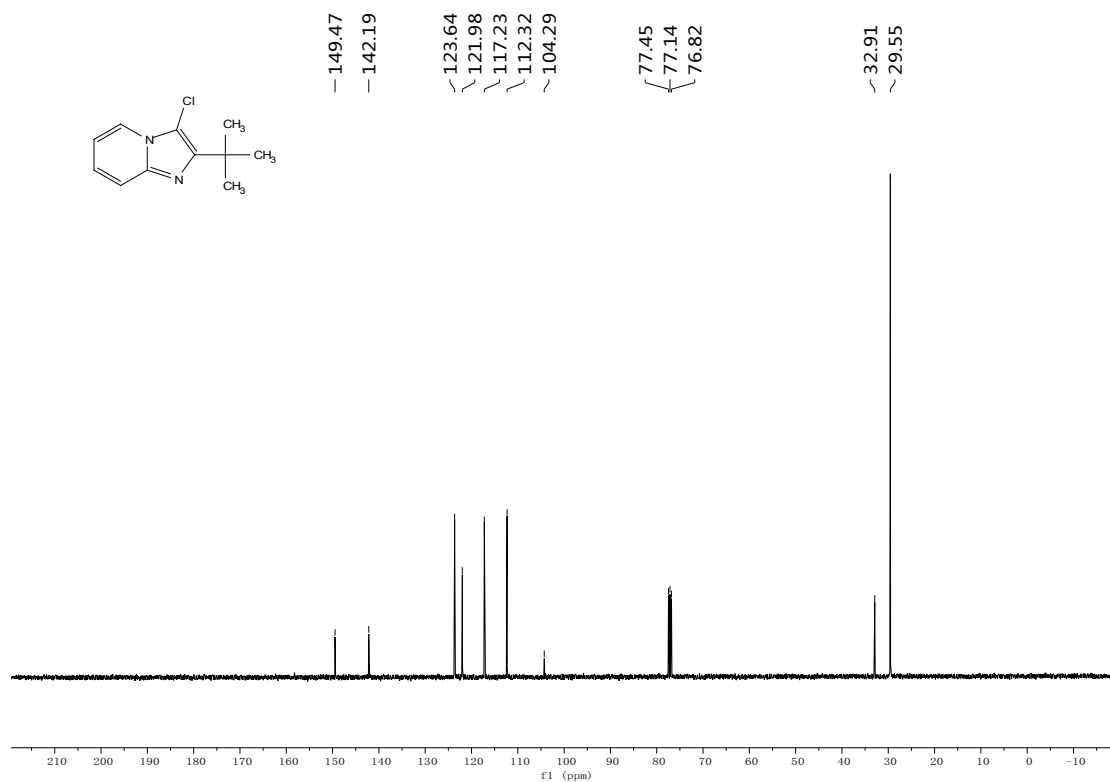

21

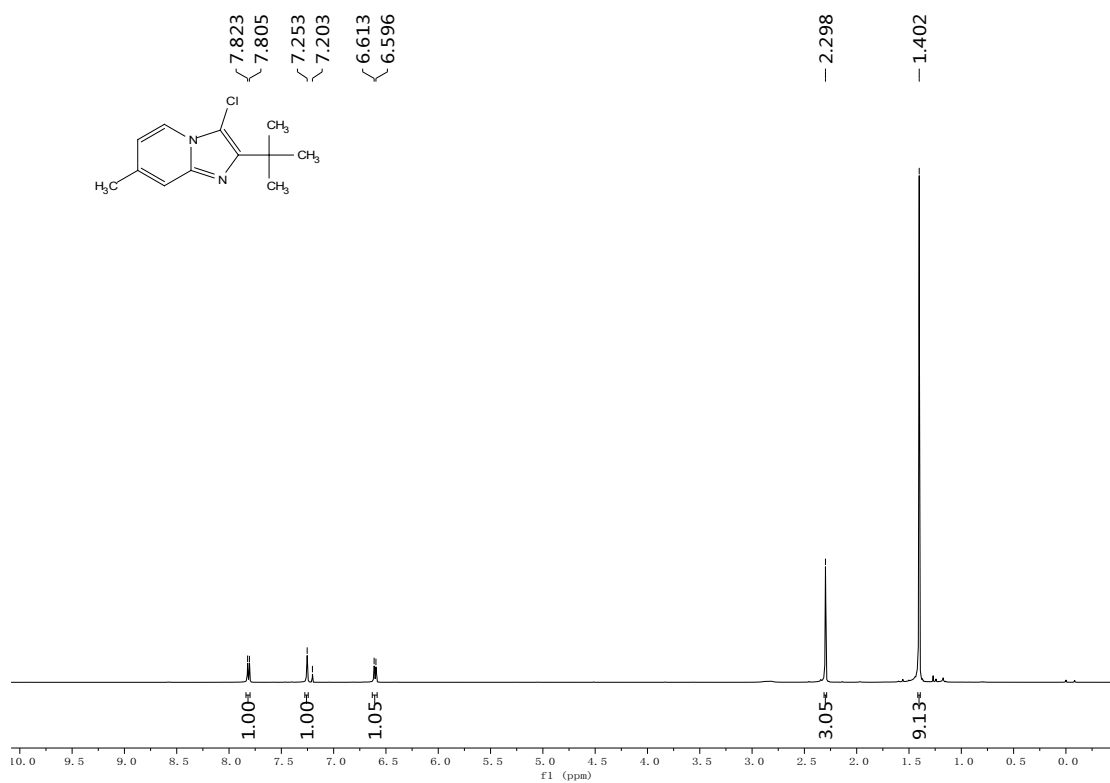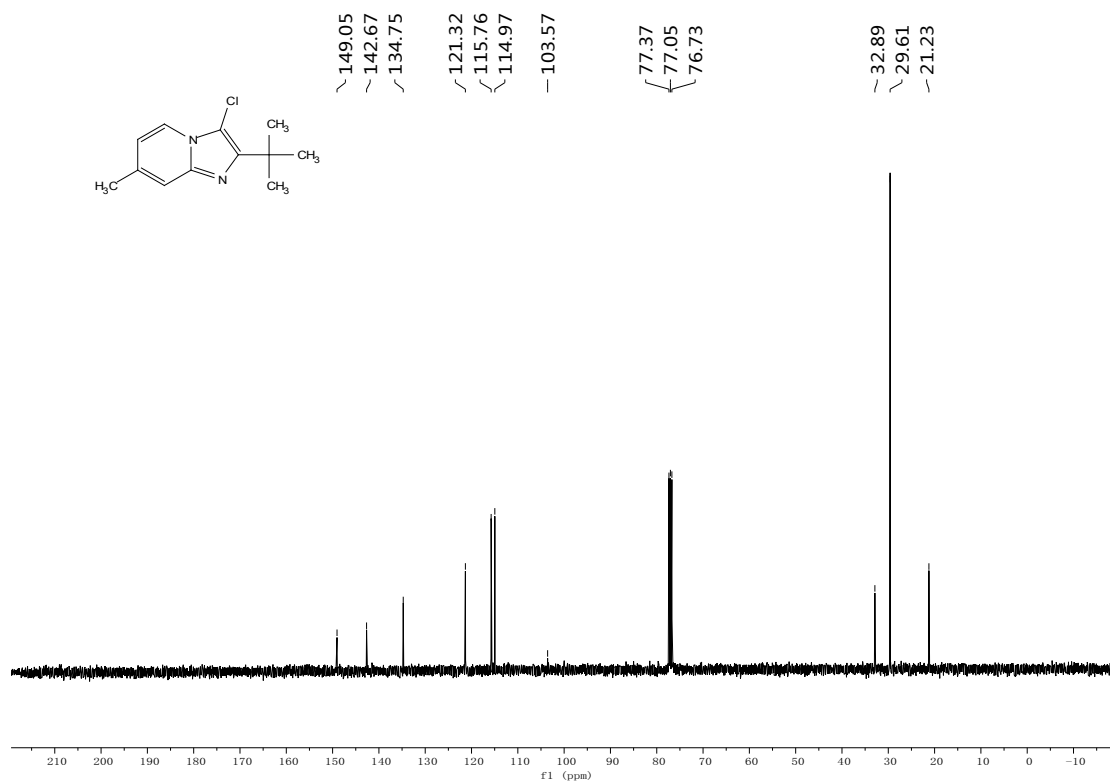

2m

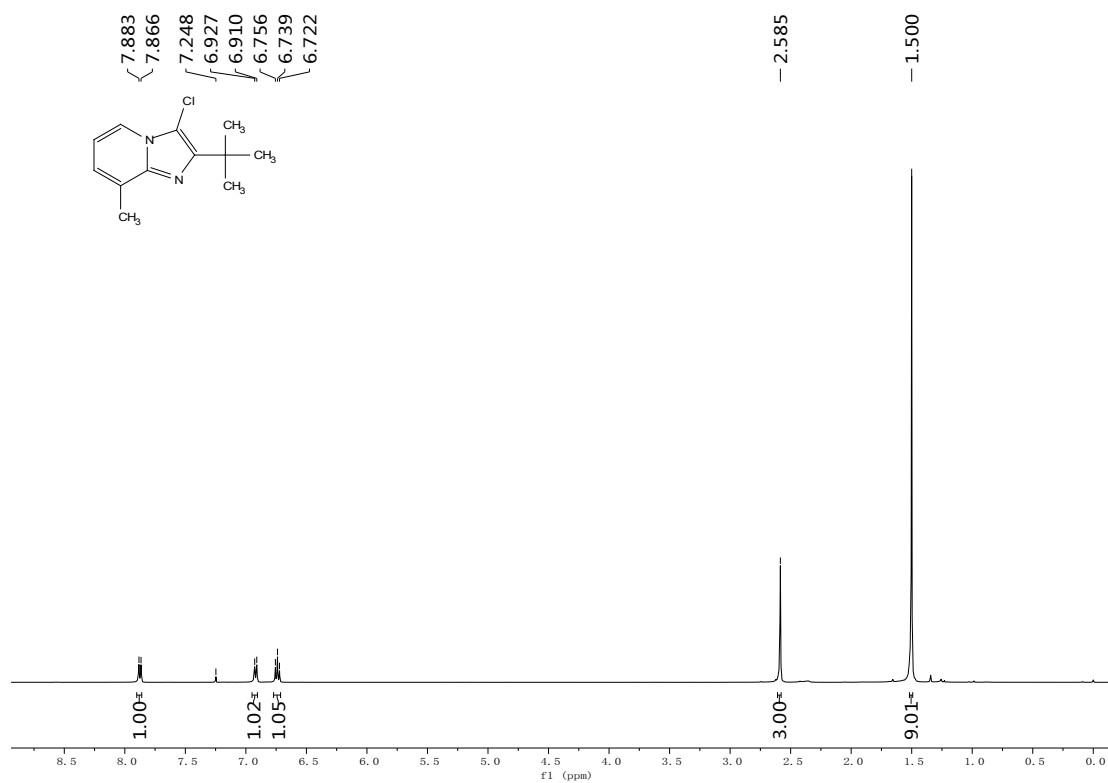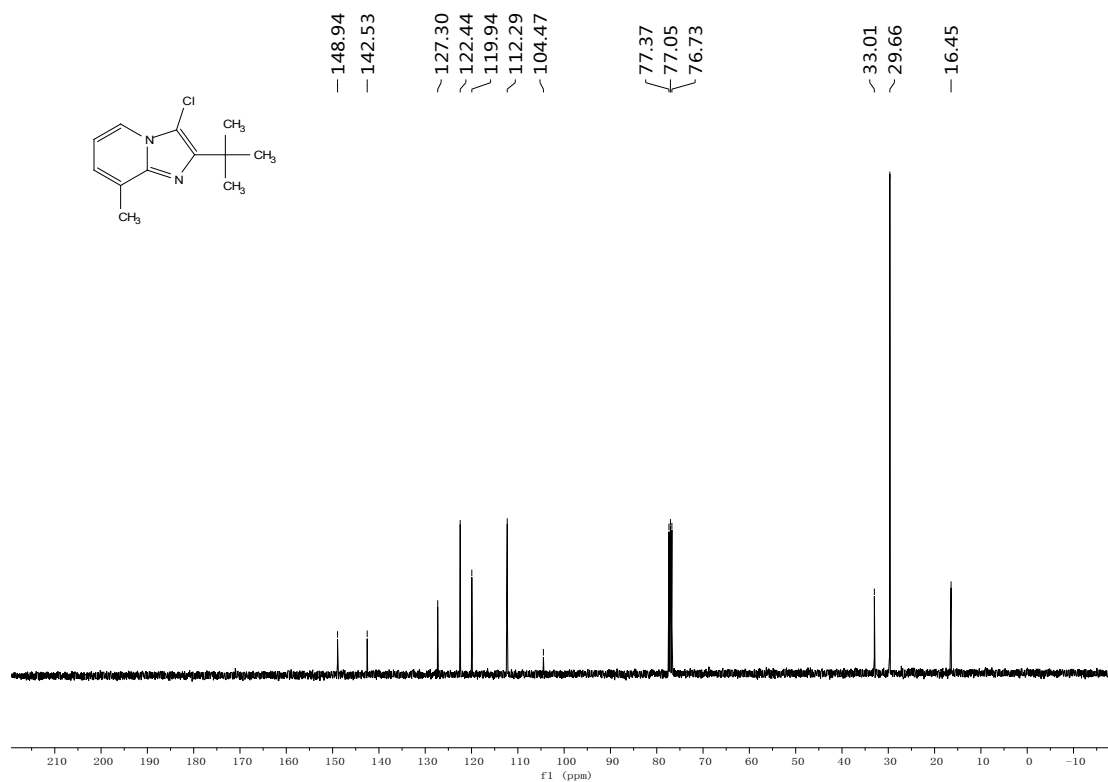

2n

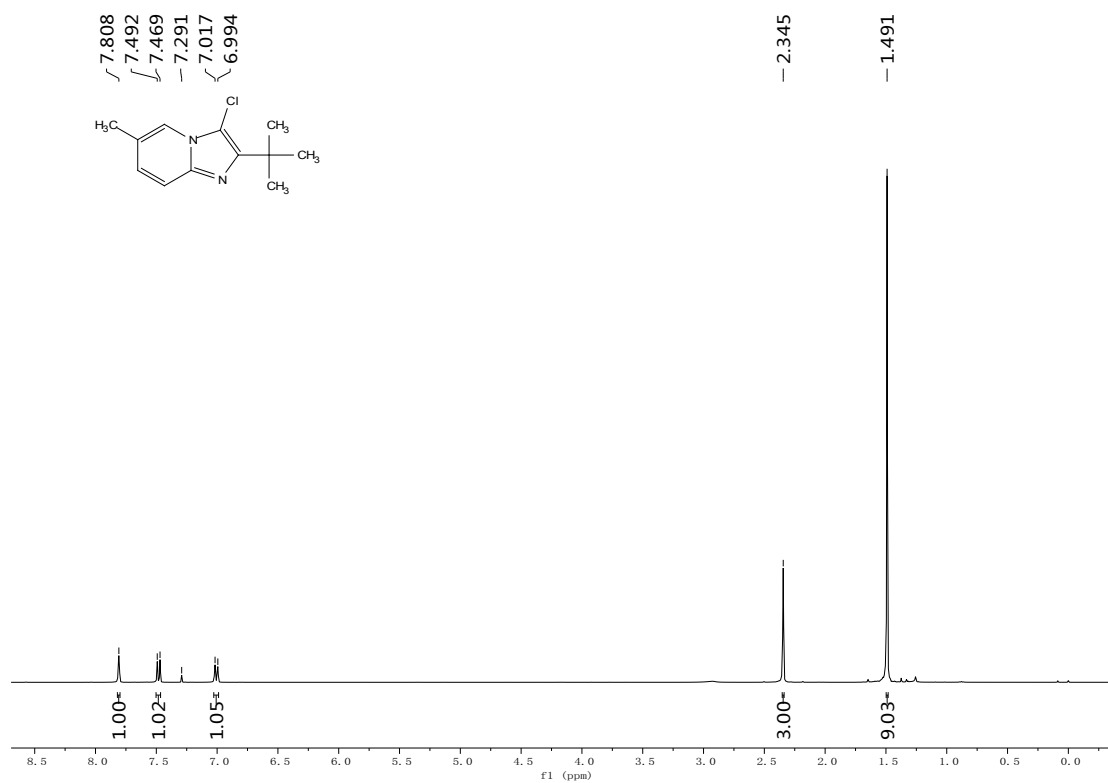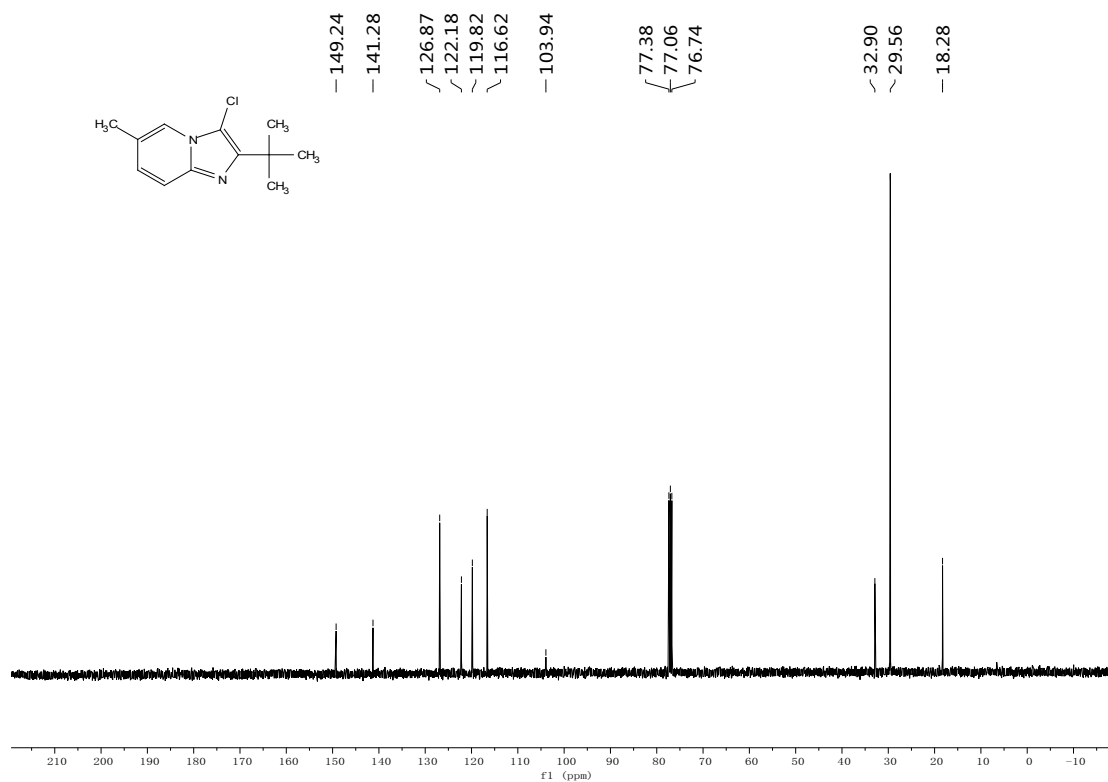



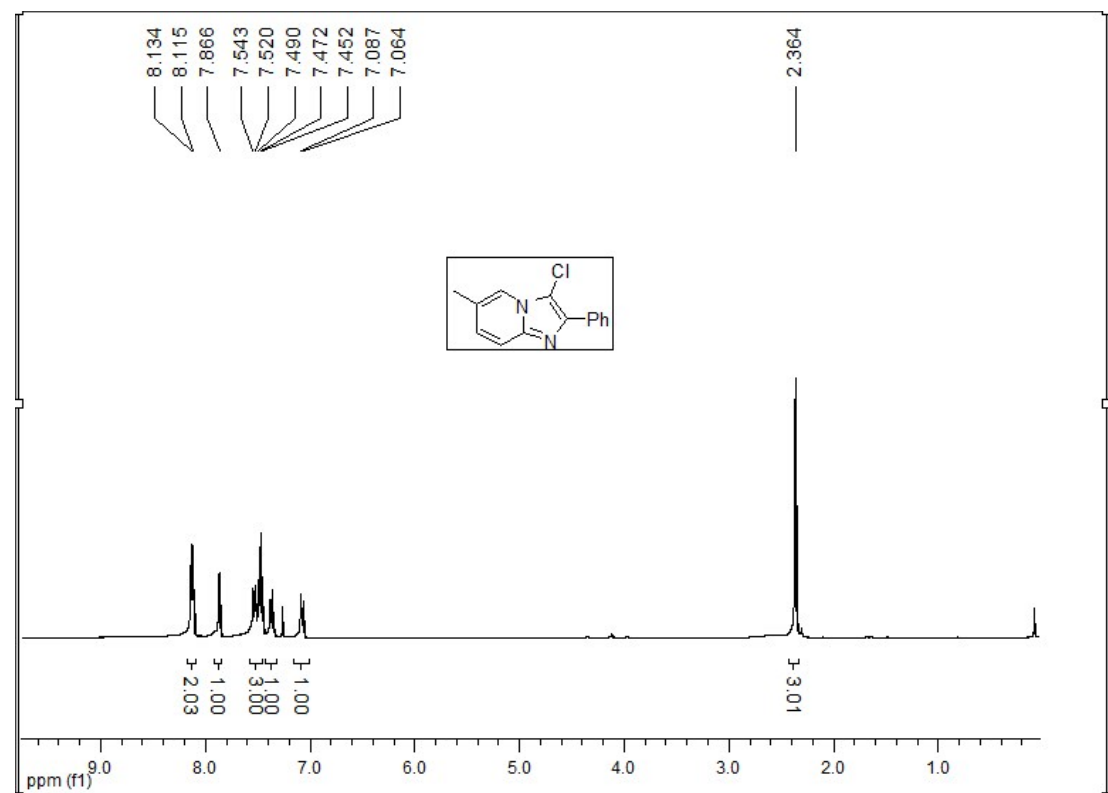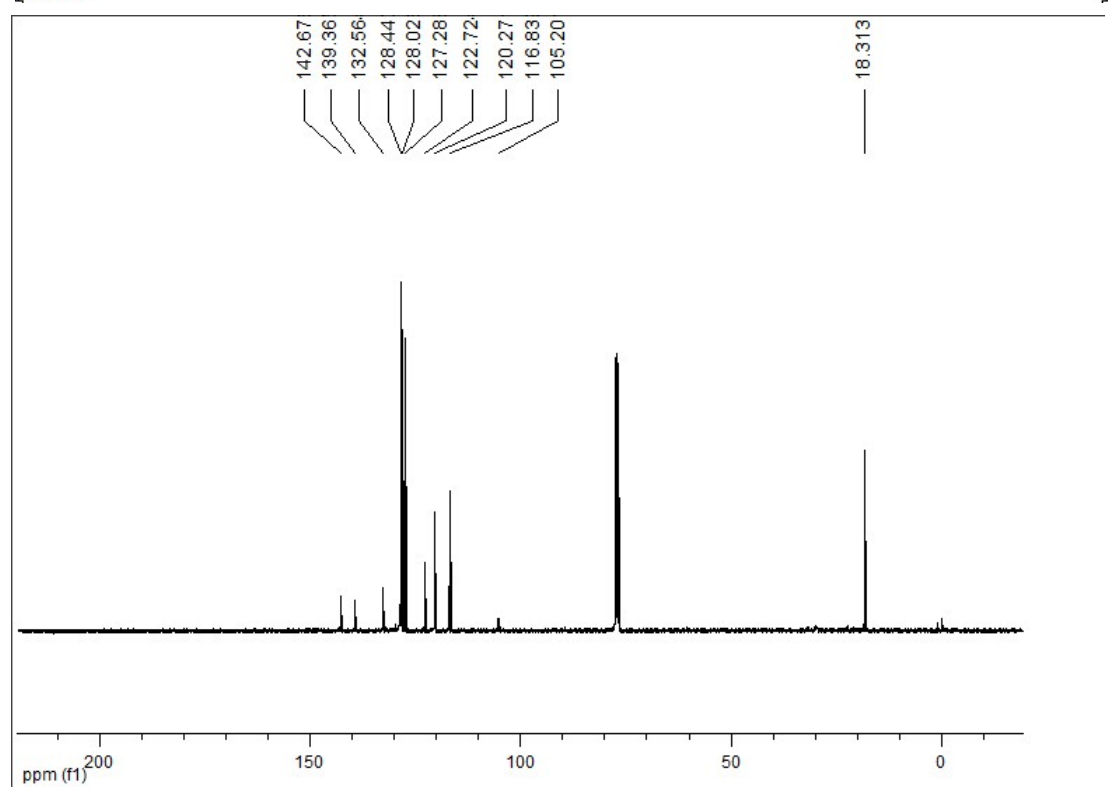

2p

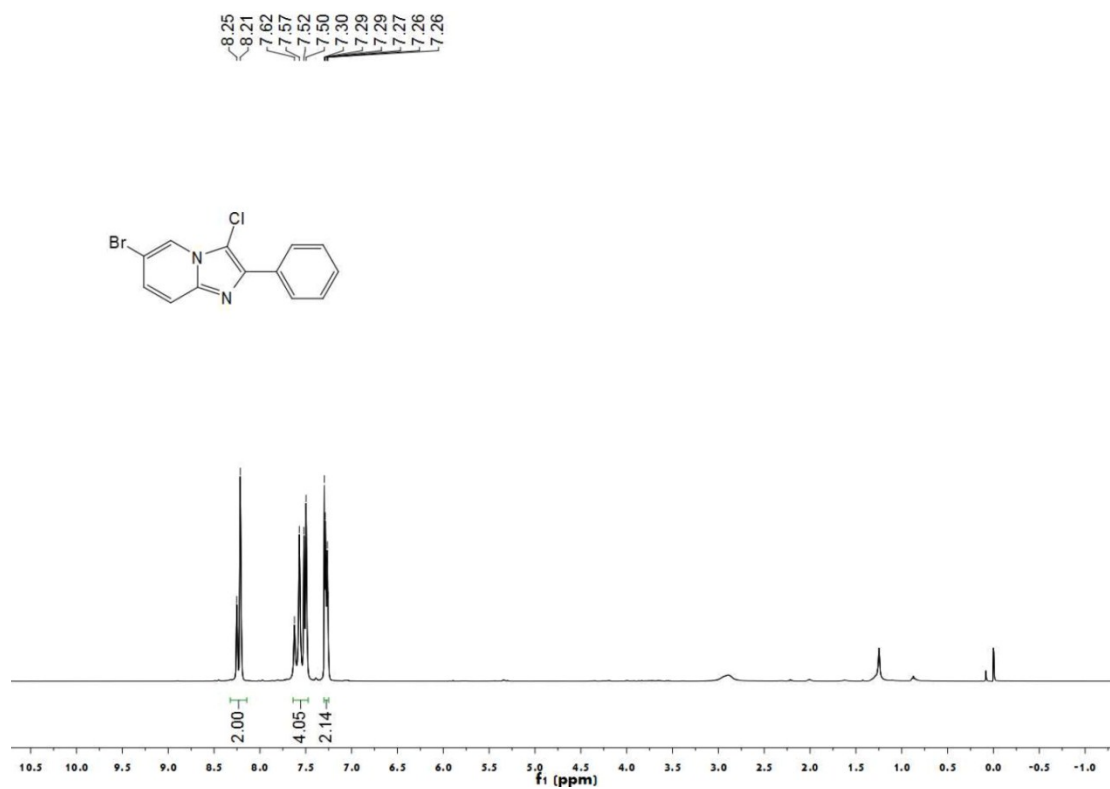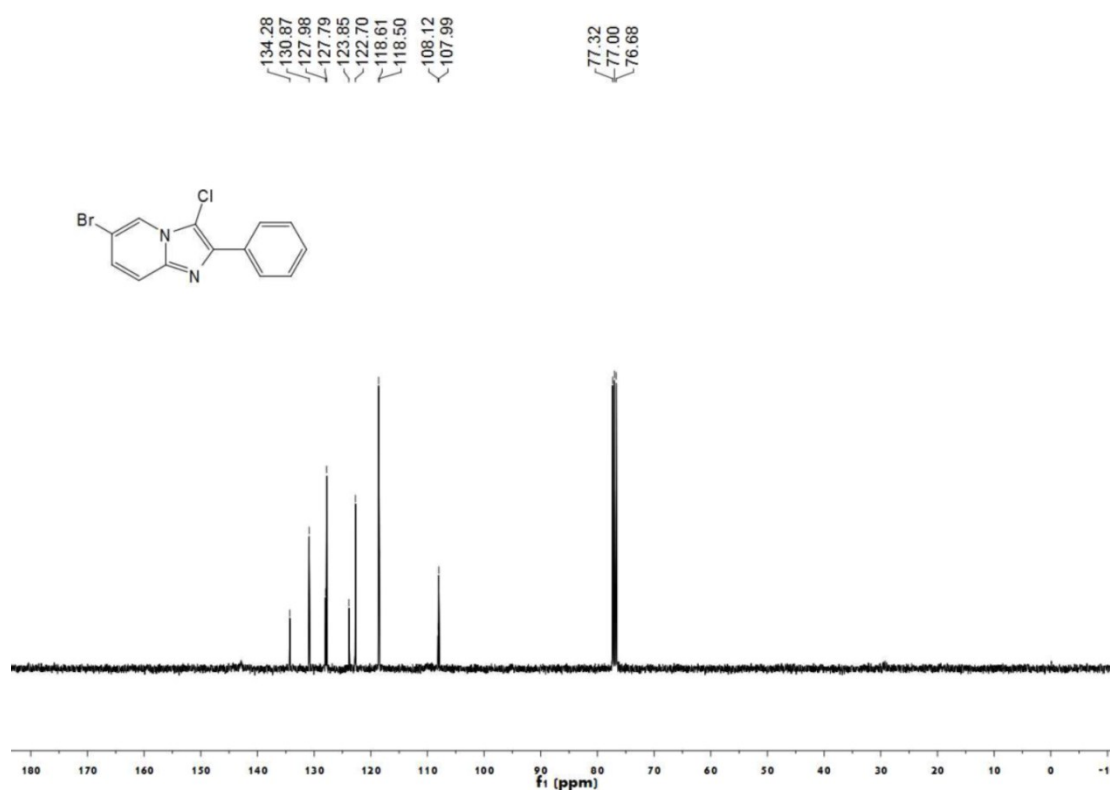

3a

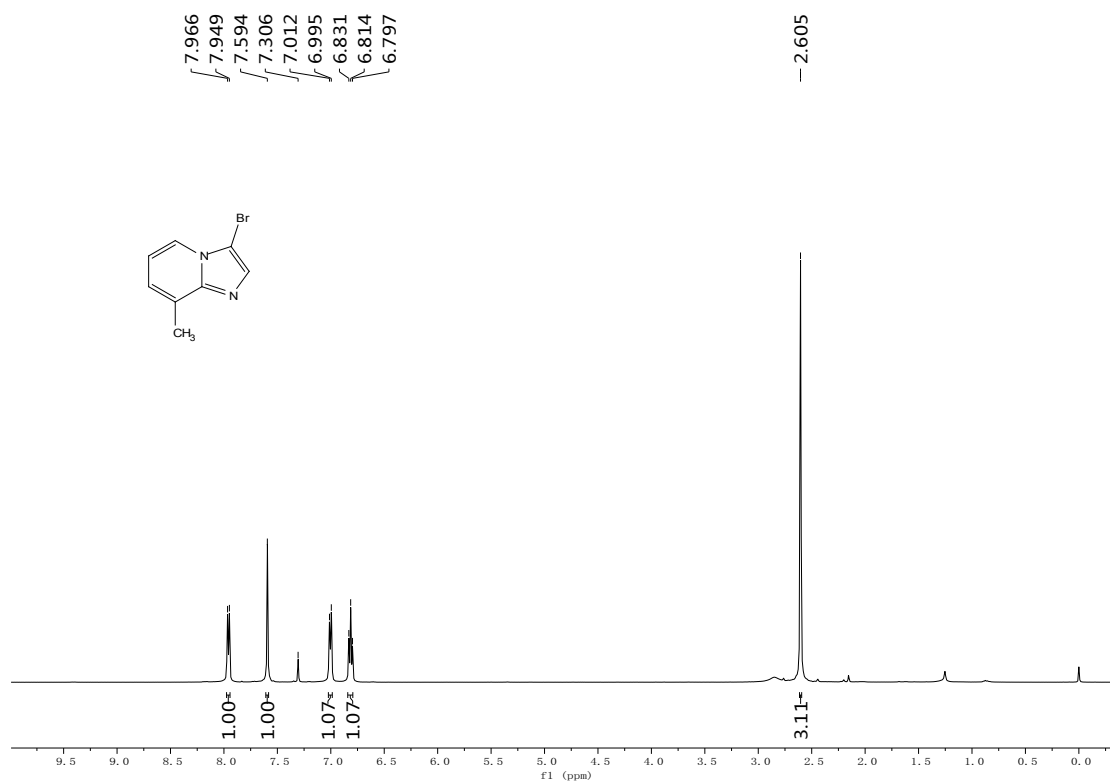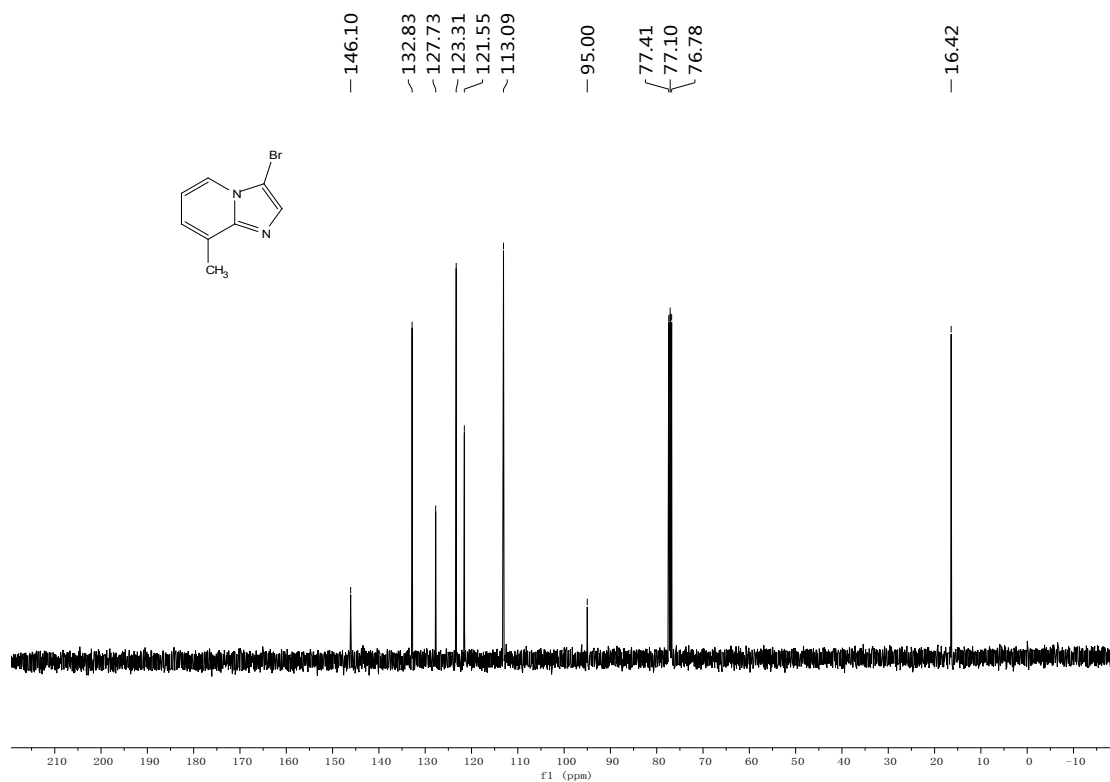

3b

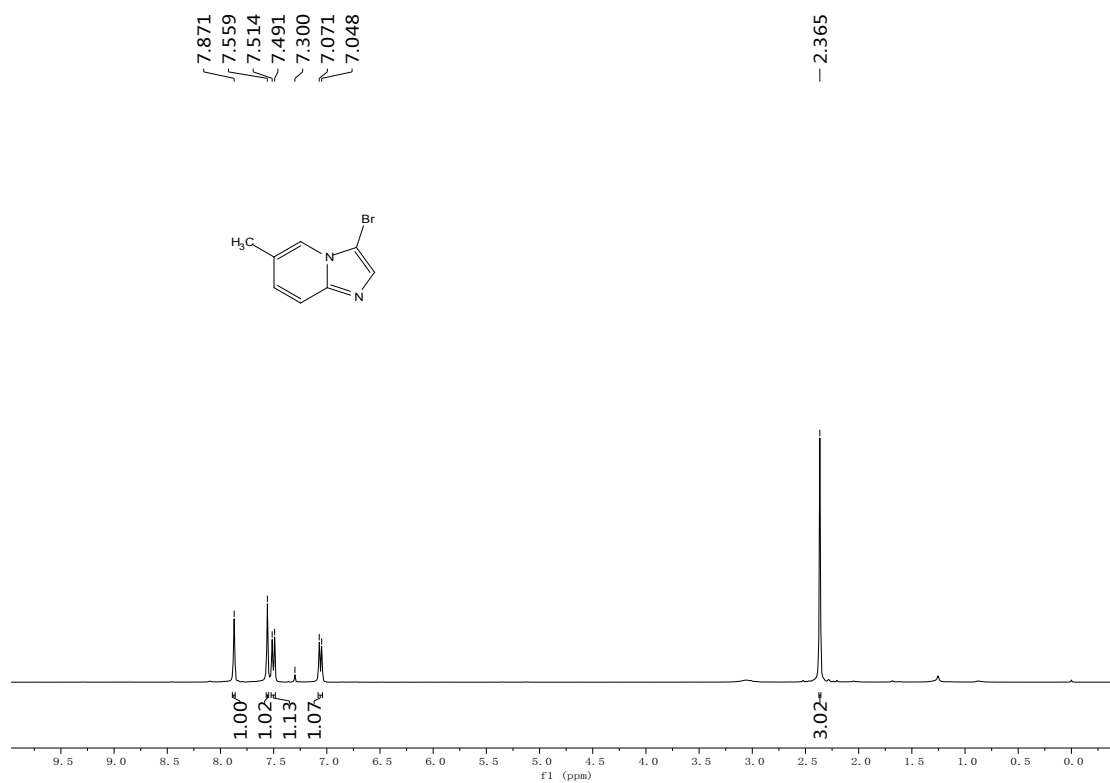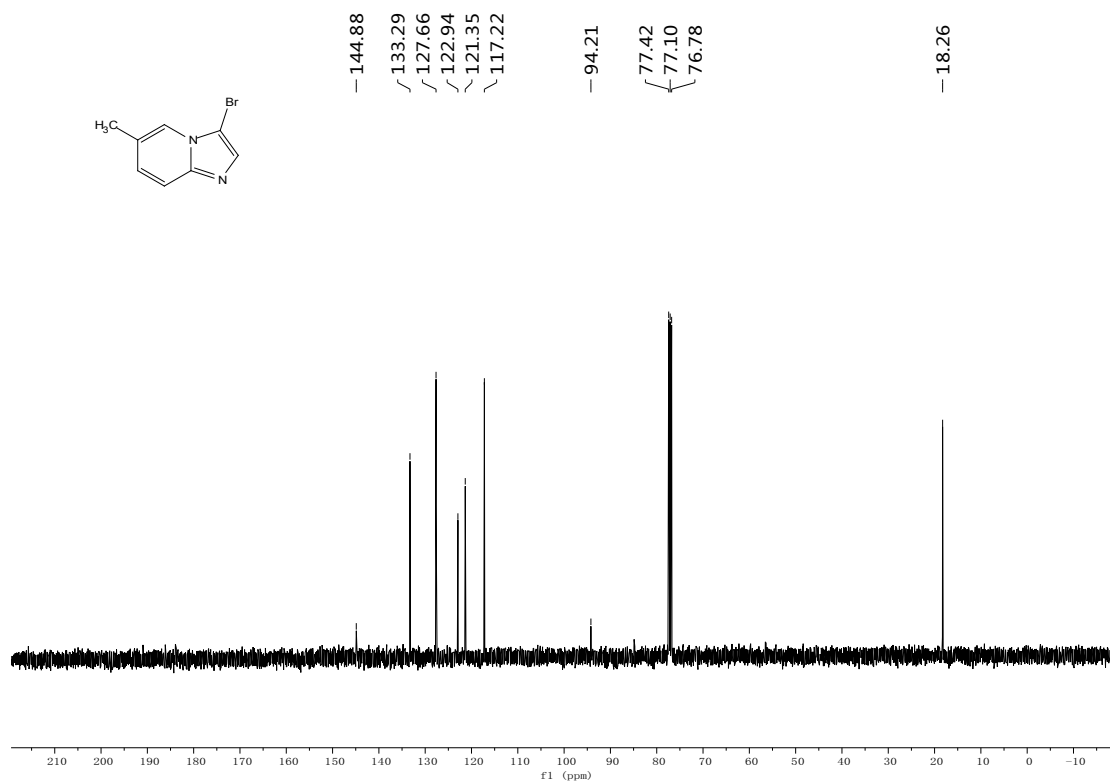

3c

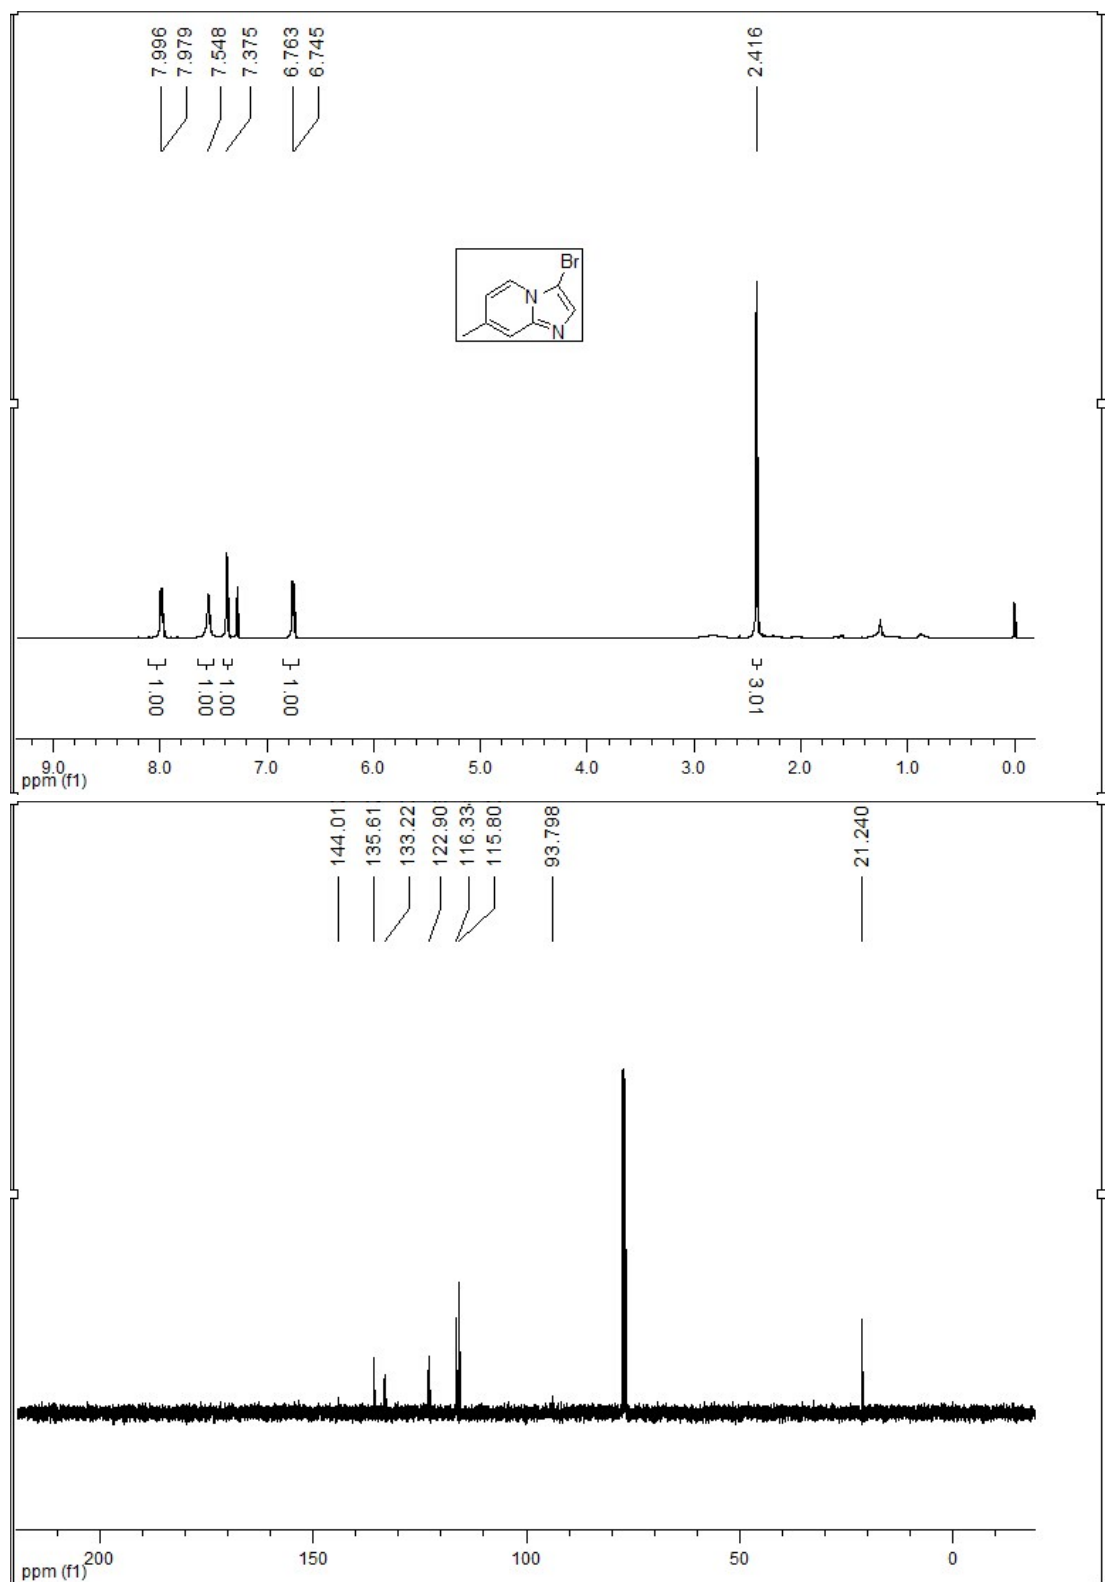

3d

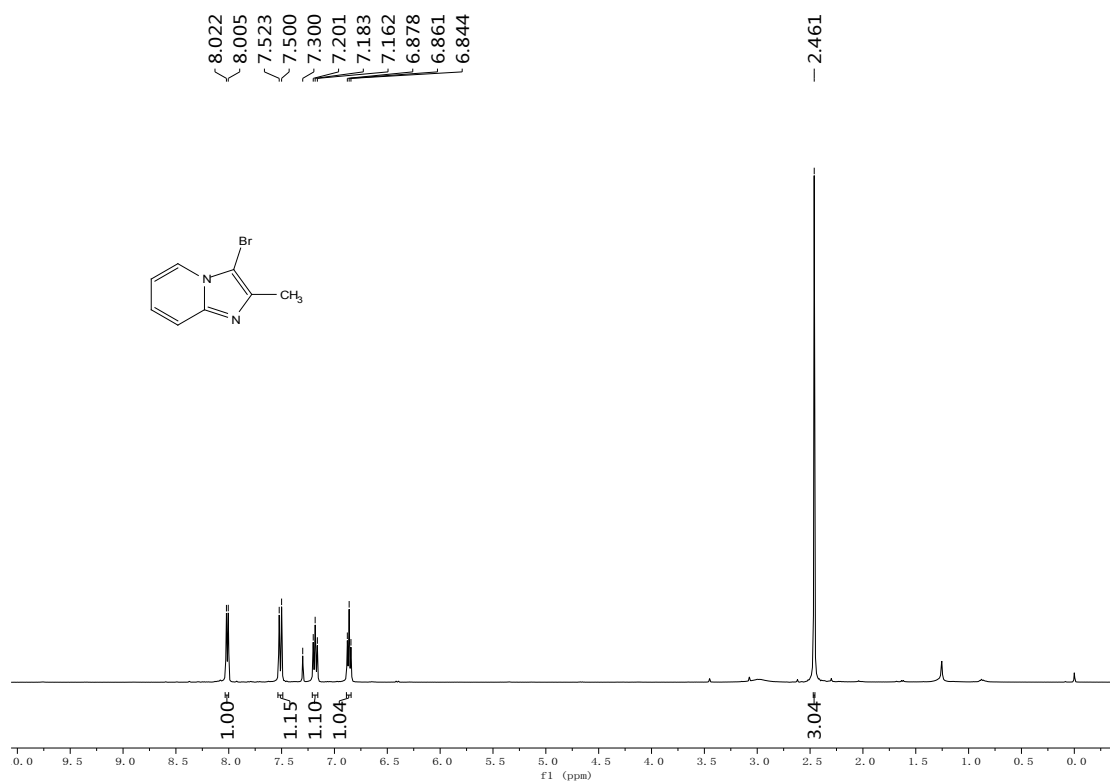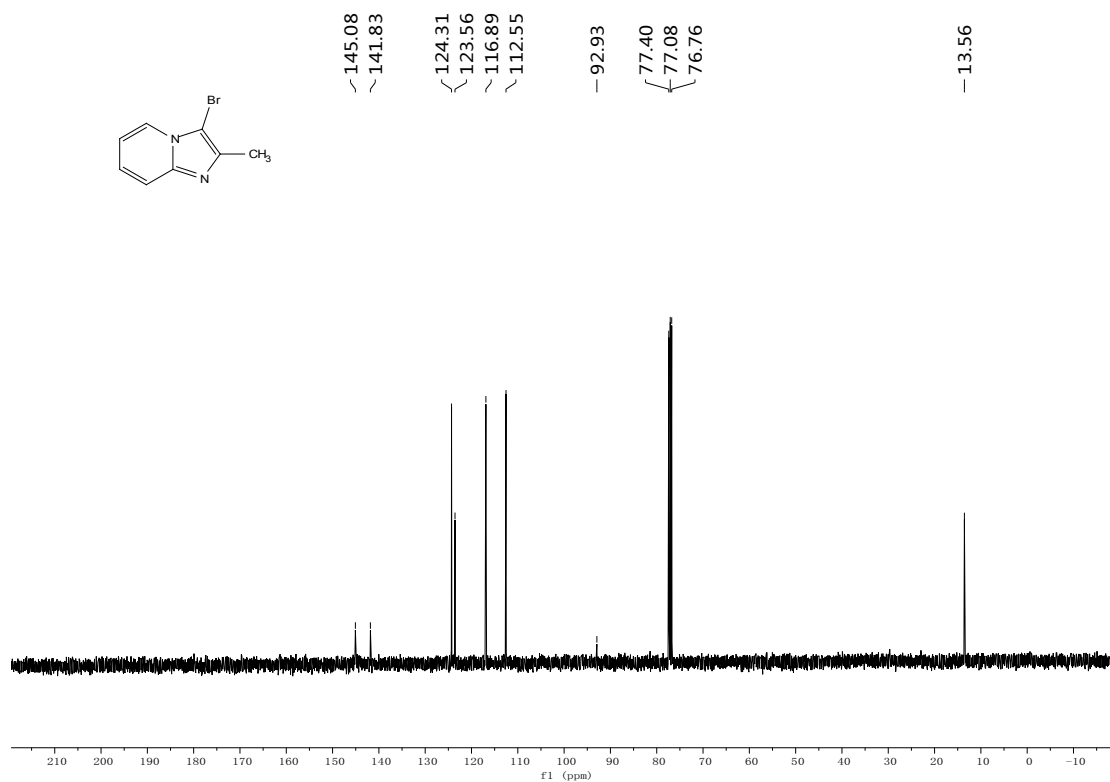

3e

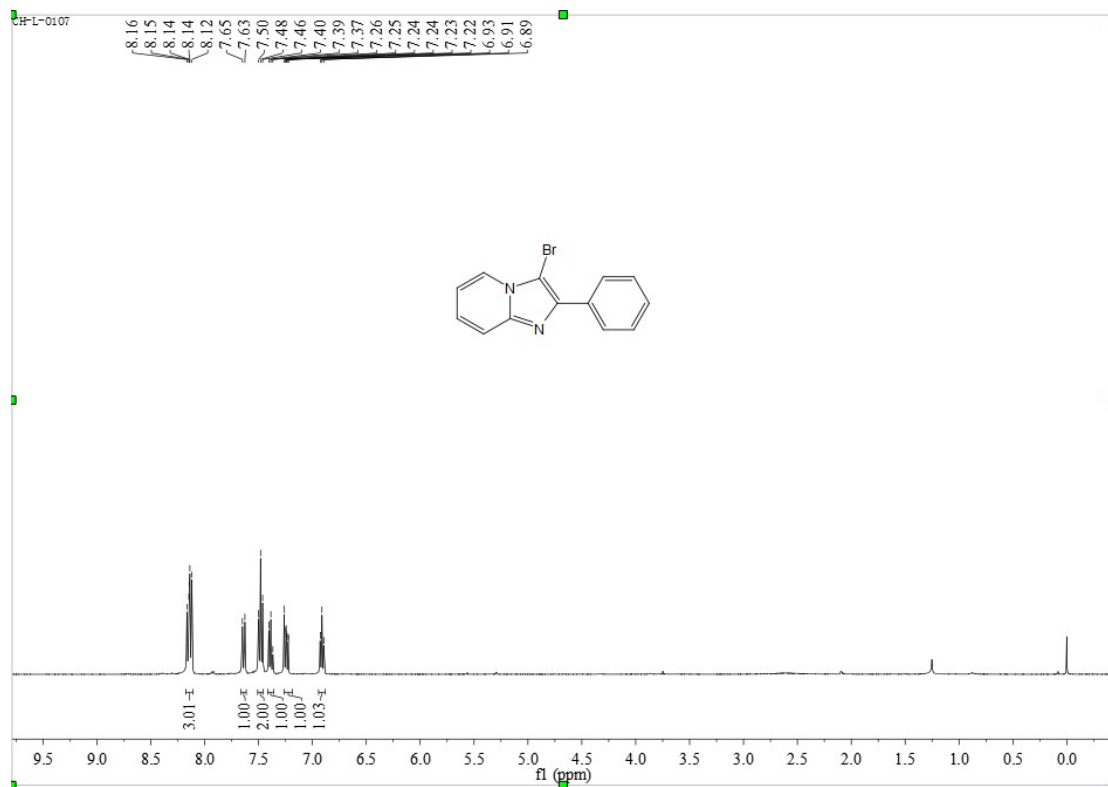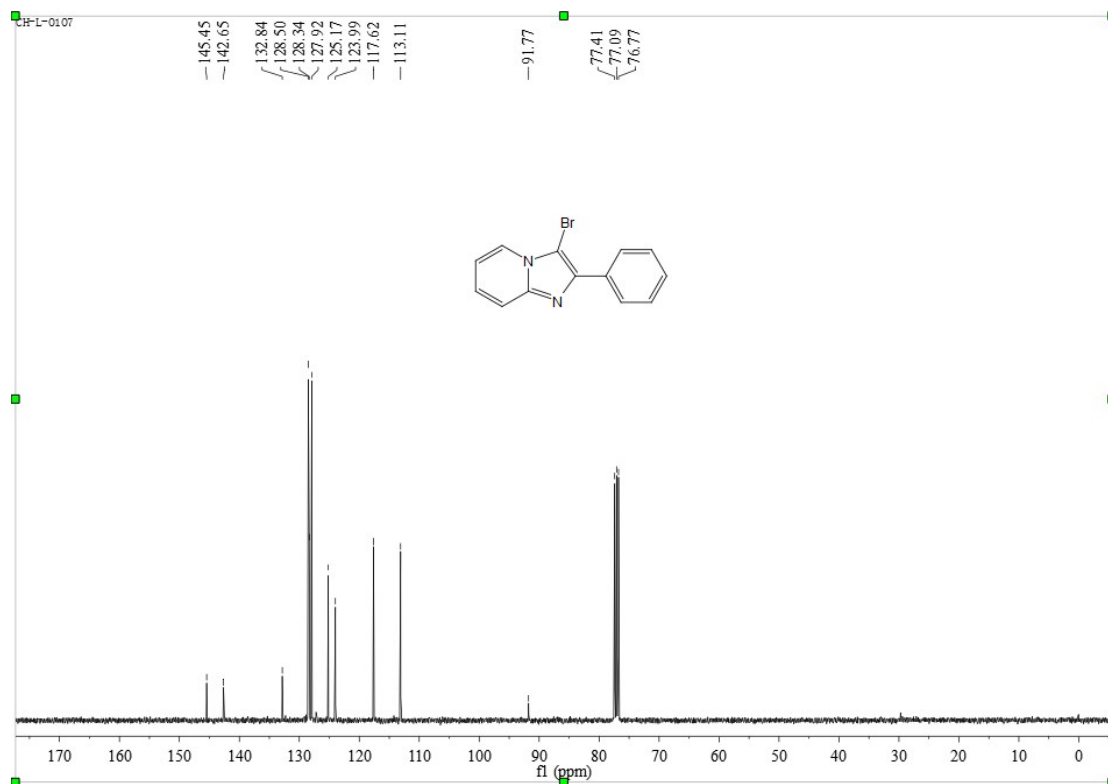

3f

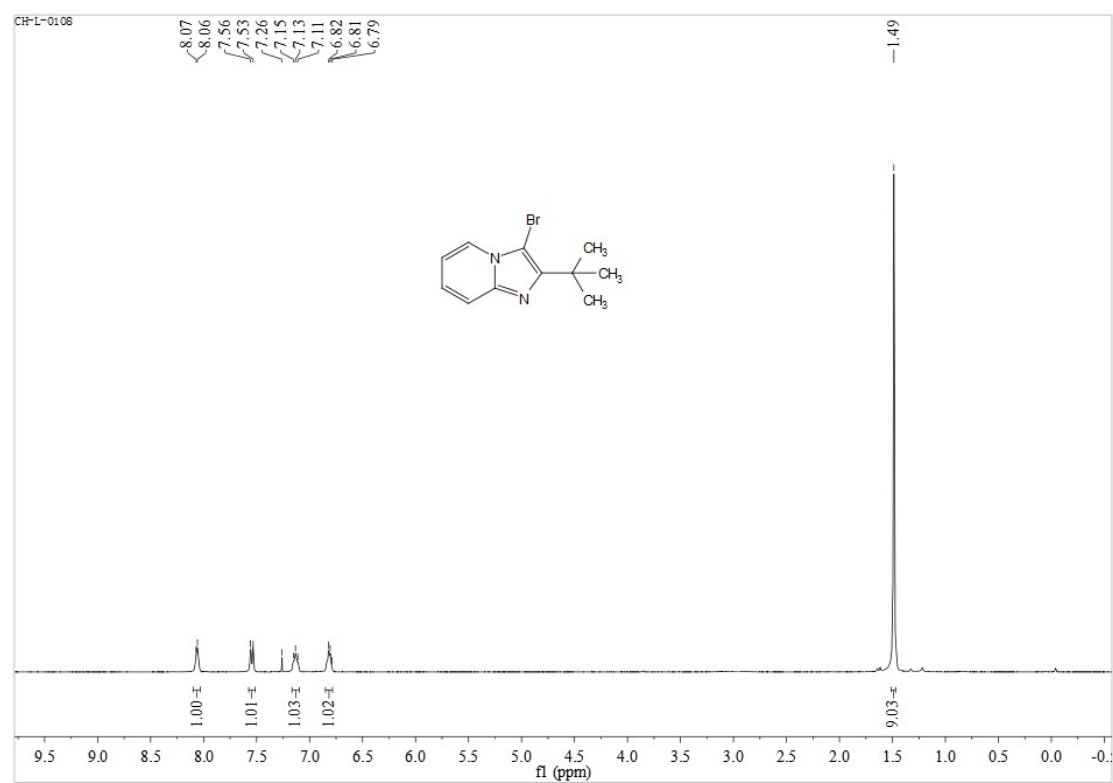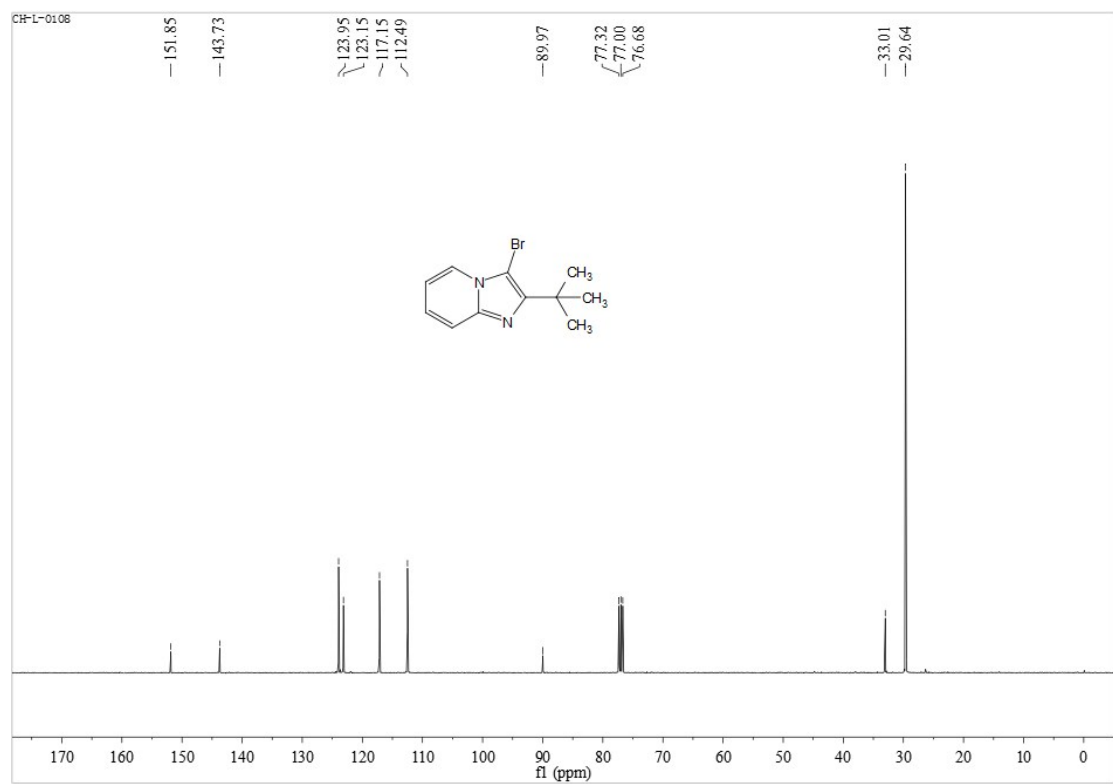



5a

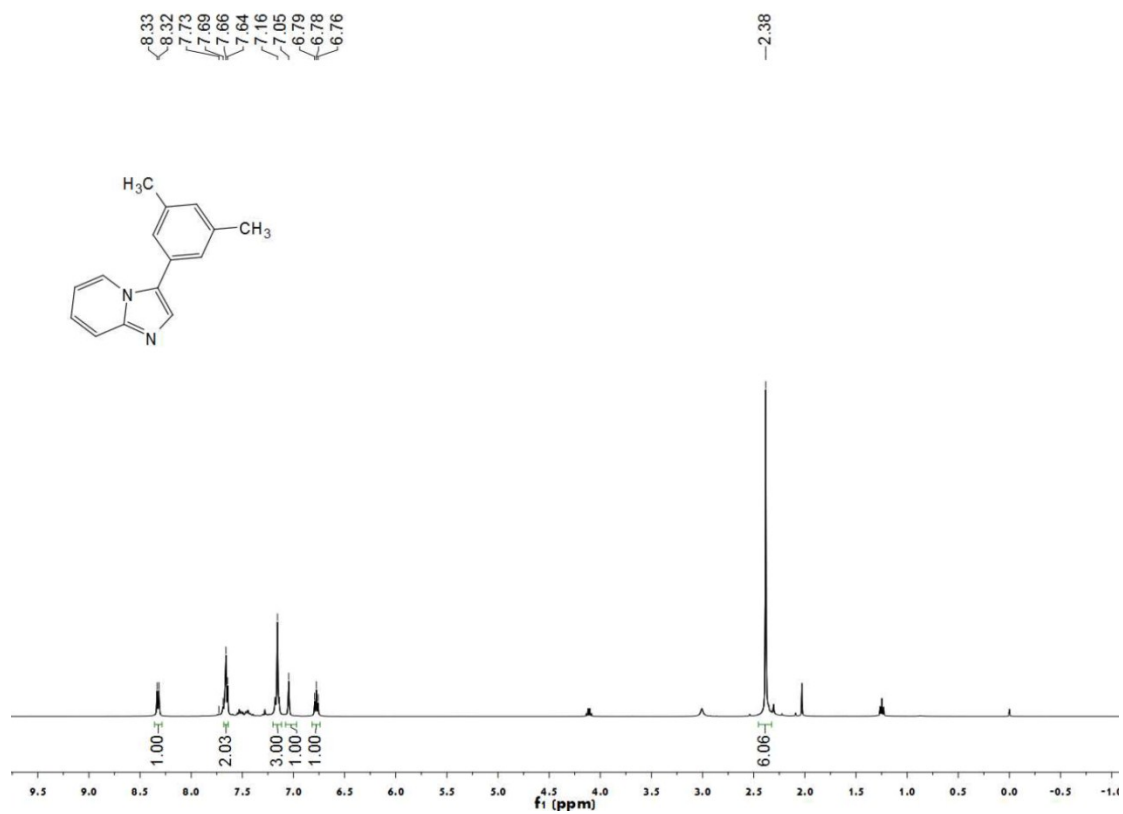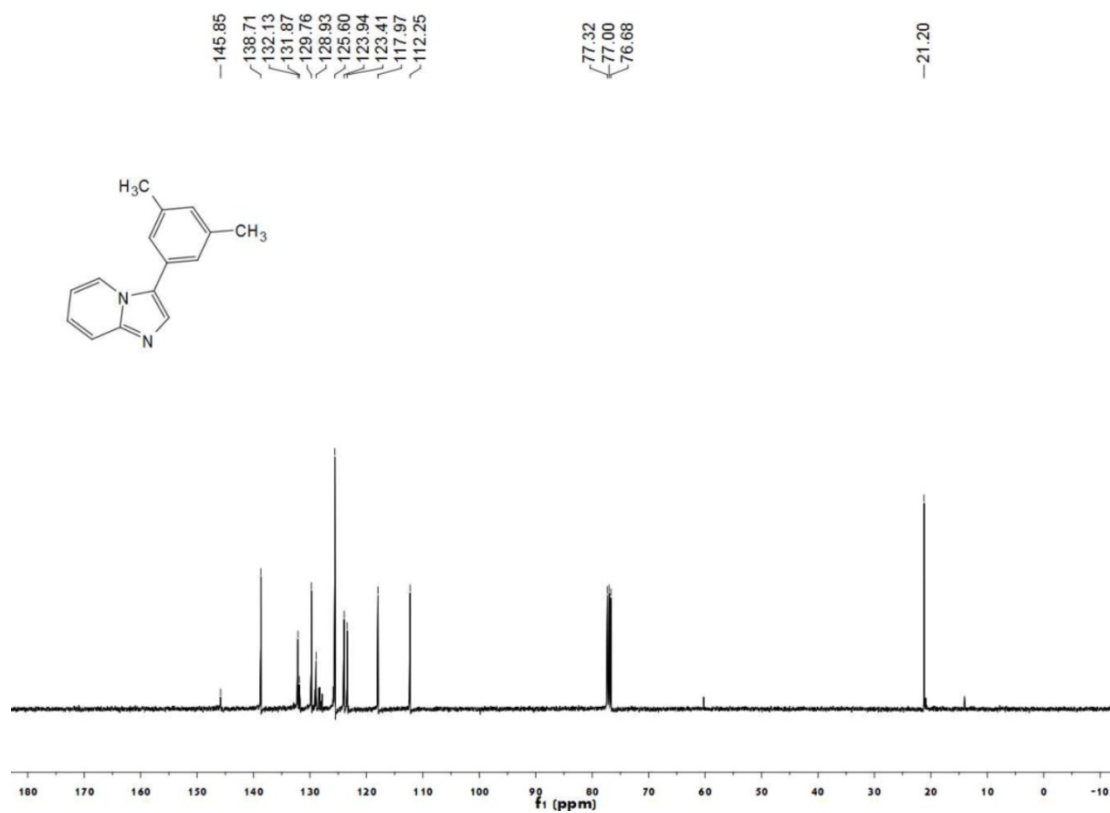

6a

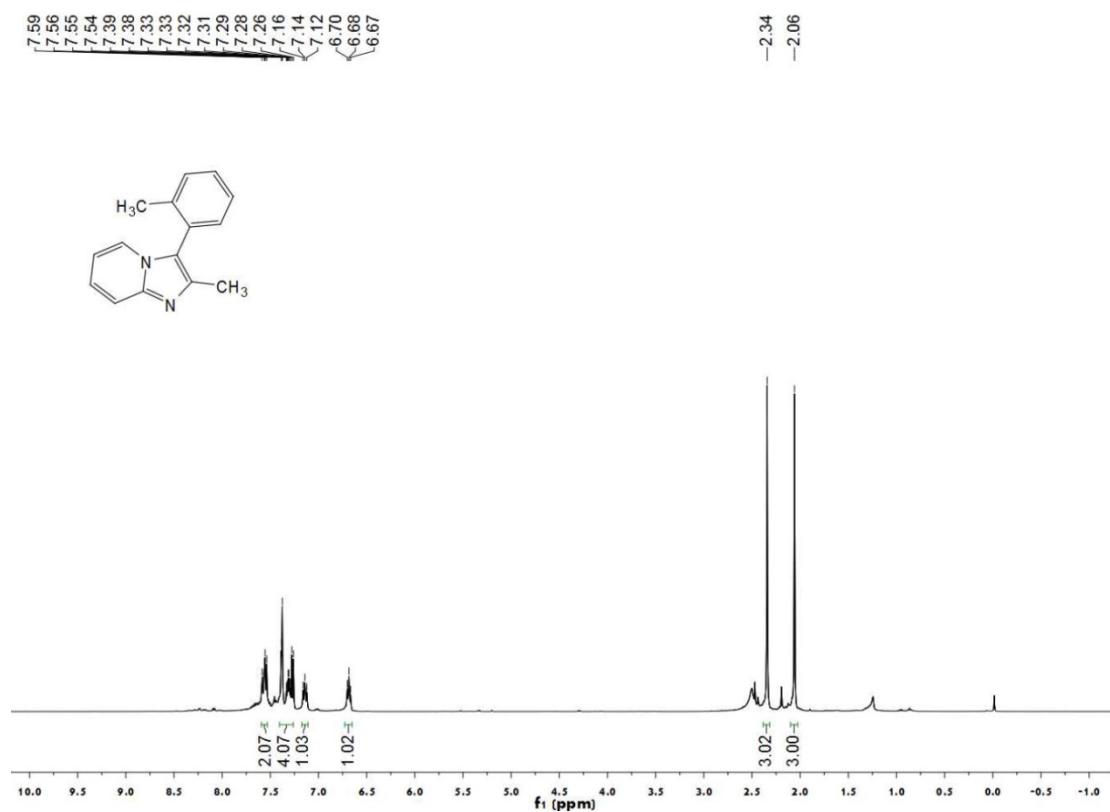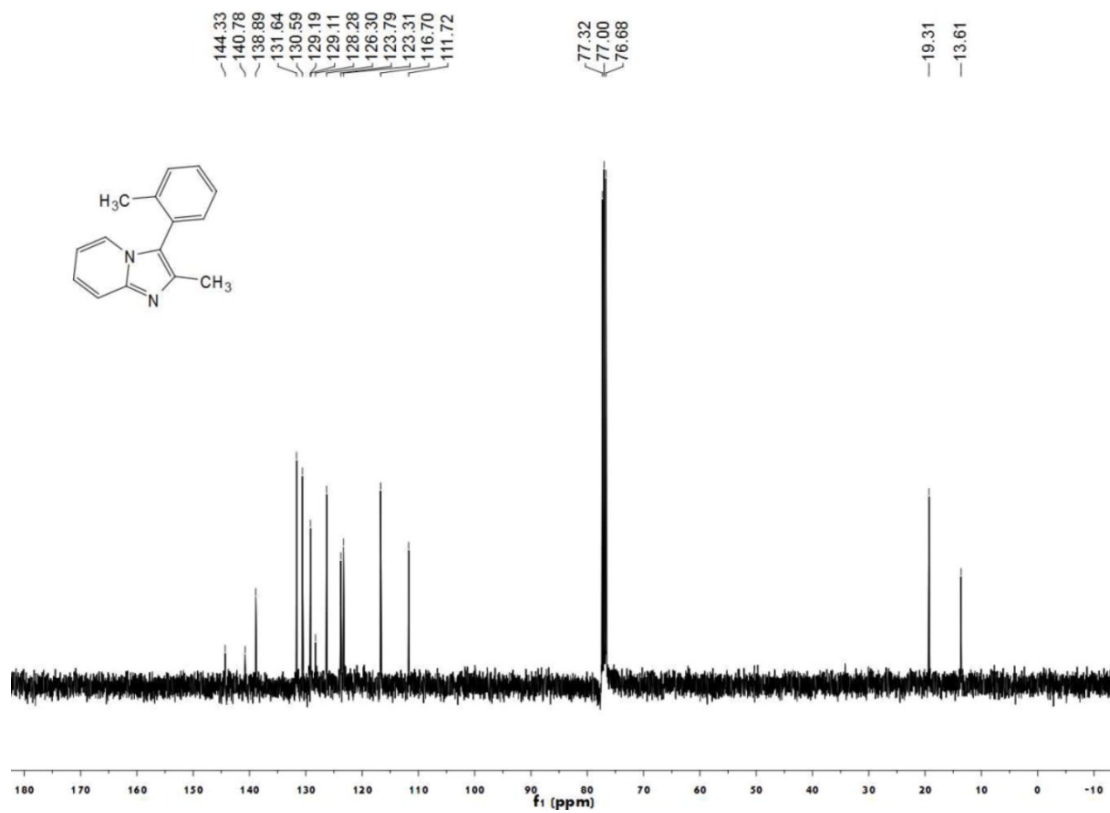

Supplement: c7ra12100h1.pdf [file c7ra12100h1.pdf]
